# Supplementary material
Source: PubMed Central journal article supplement (PMC7610646)
Supplement: EMS81865-supplement-Reporting_Summary.pdf [file EMS81865-supplement-Reporting_Summary.pdf]

## Reporting Summary

Nature Research wishes to improve the reproducibility of the work that we publish. This form provides structure for consistency and transparency in reporting. For further information on Nature Research policies, see [Authors & Referees](#) and the [Editorial Policy Checklist](#).

### Statistics

For all statistical analyses, confirm that the following items are present in the figure legend, table legend, main text, or Methods section.

- | n/a                                 | Confirmed                                                                                                                                                                                                                                                                                      |
|-------------------------------------|------------------------------------------------------------------------------------------------------------------------------------------------------------------------------------------------------------------------------------------------------------------------------------------------|
| <input type="checkbox"/>            | <input checked="" type="checkbox"/> The exact sample size ( $n$ ) for each experimental group/condition, given as a discrete number and unit of measurement                                                                                                                                    |
| <input type="checkbox"/>            | <input checked="" type="checkbox"/> A statement on whether measurements were taken from distinct samples or whether the same sample was measured repeatedly                                                                                                                                    |
| <input type="checkbox"/>            | <input checked="" type="checkbox"/> The statistical test(s) used AND whether they are one- or two-sided<br><i>Only common tests should be described solely by name; describe more complex techniques in the Methods section.</i>                                                               |
| <input type="checkbox"/>            | <input checked="" type="checkbox"/> A description of all covariates tested                                                                                                                                                                                                                     |
| <input type="checkbox"/>            | <input checked="" type="checkbox"/> A description of any assumptions or corrections, such as tests of normality and adjustment for multiple comparisons                                                                                                                                        |
| <input type="checkbox"/>            | <input checked="" type="checkbox"/> A full description of the statistical parameters including central tendency (e.g. means) or other basic estimates (e.g. regression coefficient) AND variation (e.g. standard deviation) or associated estimates of uncertainty (e.g. confidence intervals) |
| <input checked="" type="checkbox"/> | <input type="checkbox"/> For null hypothesis testing, the test statistic (e.g. $F$ , $t$ , $r$ ) with confidence intervals, effect sizes, degrees of freedom and $P$ value noted<br><i>Give <math>P</math> values as exact values whenever suitable.</i>                                       |
| <input checked="" type="checkbox"/> | <input type="checkbox"/> For Bayesian analysis, information on the choice of priors and Markov chain Monte Carlo settings                                                                                                                                                                      |
| <input type="checkbox"/>            | <input checked="" type="checkbox"/> For hierarchical and complex designs, identification of the appropriate level for tests and full reporting of outcomes                                                                                                                                     |
| <input checked="" type="checkbox"/> | <input type="checkbox"/> Estimates of effect sizes (e.g. Cohen's $d$ , Pearson's $r$ ), indicating how they were calculated                                                                                                                                                                    |

*Our web collection on [statistics for biologists](#) contains articles on many of the points above.*

### Software and code

Policy information about [availability of computer code](#)

#### Data collection

```
# Chef Instrument name : CHEF00520
Chef Script Version/263
Chef Package Version/IC.5.0.1

# Torrent Suite/5.0.4
DataCollect/3220
OIA/5002
OS/30
Graphics/52
Ion Chef/IC.5.0.1

# Flow Cytometry
Summit/software v4.3
ImageStream System Software INSPIRE/2.0

# Q-PCR
QuantStudio 12K Flex Software/v1.2.2

# Microscope
Leica Application Suite/4.9.0
ZEN (blue edition)/ 2.1
```

## Data analysis

```

# Flow Cytometry
FlowJo/10.4.1
Java/1.8.0_151
IDEAS/6.0

#Microscope
ImageJ/1.52a
java/1.8.0_45
ZEN (blue edition)/ 2.1

# Data analysis and visualization
Prism/6.0h
Ingenuity Pathway Analysis/01-13
Morpheus
Gephi/0.9.1
Circos/0.69-3
Bespoke coding (Perl)/Code available on request

# Affymetrix
Bioconductor/1.18.5
limma/3.24.15
oligo/1.32.0

# Ion Proton ChIPseq NGS
java/1.8.0_45
fastqc/0.11.2
IGVTools/2.3.57
samtools/0.1.19
bedtools/2.24.0
bamtools/2.3.0
bedGraphToBigWig/315
picard/1.118
findPeaks/3.1.8
MEME Suite/ 4.11.2

# Illumina RNAseq NGS
fastqc/0.11.2
STAR/2.5.1b
picard/1.118
java/1.8.0_45
samtools/0.1.19
bedtools/2.24.0
bamtools/2.3.0
HTSeq/0.6.1p1
subread/1.4.6-p2
trimmomatic/0.35

# Illumina RNAseq NGS - Synovial tissue
RR/3.4.4
Shiny/1.1.0
Kallisto/0.43.0
tximport/1.4.0
DESeq2/1.14.1

```

For manuscripts utilizing custom algorithms or software that are central to the research but not yet described in published literature, software must be made available to editors/reviewers. We strongly encourage code deposition in a community repository (e.g. GitHub). See the Nature Research [guidelines for submitting code & software](#) for further information.

## Data

Policy information about [availability of data](#)

All manuscripts must include a [data availability statement](#). This statement should provide the following information, where applicable:

- Accession codes, unique identifiers, or web links for publicly available datasets
- A list of figures that have associated raw data
- A description of any restrictions on data availability

- The data sets generated during the current study for Microarray data are available in ArrayExpress: <https://www.ebi.ac.uk/arrayexpress/experiments/E-MTAB-7682>

- The data sets generated during the current study for ChIP-seq are available in ArrayExpress: <https://www.ebi.ac.uk/arrayexpress/experiments/E-MTAB-6273>  
 Username: Reviewer\_E-MTAB-6273  
 Password: 7tBavowV

- Other datasets used for the analysis are available in GEO: GSE40463, GSE60482, GSE65621

## Field-specific reporting

Please select the one below that is the best fit for your research. If you are not sure, read the appropriate sections before making your selection.

- Life sciences       Behavioural & social sciences       Ecological, evolutionary & environmental sciences

For a reference copy of the document with all sections, see [nature.com/documents/nr-reporting-summary-flat.pdf](https://www.nature.com/documents/nr-reporting-summary-flat.pdf)

## Life sciences study design

All studies must disclose on these points even when the disclosure is negative.

|                 |                                                                                                                                                                                                                                                                                                                                                                                                                                                                                                                                                                                                                                                                                                                                                                                                                                                                                                                                                                      |
|-----------------|----------------------------------------------------------------------------------------------------------------------------------------------------------------------------------------------------------------------------------------------------------------------------------------------------------------------------------------------------------------------------------------------------------------------------------------------------------------------------------------------------------------------------------------------------------------------------------------------------------------------------------------------------------------------------------------------------------------------------------------------------------------------------------------------------------------------------------------------------------------------------------------------------------------------------------------------------------------------|
| Sample size     | Sample size were determined through experience :<br>- Microarray data: we have 2 sample per condition. One of them was used for microarray and the other one for qPCR validation.<br>- ChIP: we have 2 sample per condition. One of them was used for sequencing and the other one for qPCR validation.<br><br>For microarray and ChIP-seq techniques, qPCR analysis help to correct the biases of the preferences of the biochip and sequencer for certain sequences and for the bioinformatic processes that are used to analyse the data.<br><br>- FACs analysis: at least biological triplicates.<br>- RNA-seq synovial tissue: sample size was determined based on pilot RNA-seq of 29 synovial samples.                                                                                                                                                                                                                                                        |
| Data exclusions | Not data excluded                                                                                                                                                                                                                                                                                                                                                                                                                                                                                                                                                                                                                                                                                                                                                                                                                                                                                                                                                    |
| Replication     | All attempts at replication were successful. Experiments have been repeated by different authors and in some cases different techniques have been used - e.g., flow cytometry and immunohistochemistry or Chip-seq and ChIP-qPCR.                                                                                                                                                                                                                                                                                                                                                                                                                                                                                                                                                                                                                                                                                                                                    |
| Randomization   | Mouse studies - Studies of antigen-induced arthritis were conducted on male mice to ensure optimal priming of the disease model (>98% penetrance). Since the experimental design was not established to compared difference in responses between groups of mice no randomisation was applied.<br><br>Human studies - Synovial biopsies were obtained from patients entered into an open-label randomised controlled clinical trial of biological drug intervention. Patients enrolled to the study were stratified according to the synovial pathology, and were randomised to receive specific biological drug therapy after all clinical screening protocols were conducted. Our study was not subject to this randomisation since we were interested in the synovial gene expression profile associated with defined pathotypes prior to drug treatment. These analyses were independent of the biological drug intervention underpinning the wider trial design. |
| Blinding        | Blinding was not performed. Data reported are not subjective. Computational analysis was not performed blinded.                                                                                                                                                                                                                                                                                                                                                                                                                                                                                                                                                                                                                                                                                                                                                                                                                                                      |

## Reporting for specific materials, systems and methods

We require information from authors about some types of materials, experimental systems and methods used in many studies. Here, indicate whether each material, system or method listed is relevant to your study. If you are not sure if a list item applies to your research, read the appropriate section before selecting a response.

### Materials & experimental systems

- | n/a                                 | Involved in the study                                           |
|-------------------------------------|-----------------------------------------------------------------|
| <input type="checkbox"/>            | <input checked="" type="checkbox"/> Antibodies                  |
| <input type="checkbox"/>            | <input checked="" type="checkbox"/> Eukaryotic cell lines       |
| <input checked="" type="checkbox"/> | <input type="checkbox"/> Palaeontology                          |
| <input type="checkbox"/>            | <input checked="" type="checkbox"/> Animals and other organisms |
| <input type="checkbox"/>            | <input checked="" type="checkbox"/> Human research participants |
| <input checked="" type="checkbox"/> | <input type="checkbox"/> Clinical data                          |

### Methods

- | n/a                                 | Involved in the study                              |
|-------------------------------------|----------------------------------------------------|
| <input type="checkbox"/>            | <input checked="" type="checkbox"/> ChIP-seq       |
| <input type="checkbox"/>            | <input checked="" type="checkbox"/> Flow cytometry |
| <input checked="" type="checkbox"/> | <input type="checkbox"/> MRI-based neuroimaging    |

## Antibodies

Antibodies used

Protein name / Supplier / Catalog number / Clone / Lot number/Dilution  
STAT1 / Santa Cruz Biotechnology / sc-592 / p84-p91/ K0414/5ugr  
STAT3 / Santa Cruz Biotechnology / sc-482 / C-20/ D1315/5ugr  
CD3 APC-Cy7 / BD Biosciences / 560590 / 17A2 / 6027584/1:200  
CD4 PerPCP-Cy5.5 / eBioscience / 45- 0042-82 / RM4-5/ E08292-1632/1:200

CD25 PE / eBioscience / 12-0251-83 / PC61.5 / E01155-1631/1:200  
 CD44 APC/ eBioscience / 17-0441-83 / IM7 / E07147-1631/1:200  
 CD62L FITC / eBioscience / 11-0621-85 / MEL-14 / E00377-1633/1:200  
 CD62L PE-Texas / Life technologies / RM4317 / MEL-14 / 1662867/1:200  
 CD126 APC / BioLegend / 115812 / D7715A7 / B143205/1:100  
 CD127 PE-Cyanine7 / eBioscience / 25-1271-82 / A7R34 / E07599-1635/1:200  
 TCR APC / BD Biosciences / 553174 / H57-597 / 38374/1:100  
 gp130 APC / R&D Systems / FAB4681A / 125623 / AAOK0108081/1:100  
 IFNgamma eFluor450 / eBioscience / 48-7311-80 / XMG1.2 / E10945-1633/1:200  
 IL-4 PE / eBioscience / 12-7041-82 / 11B11 / E02067-1633/1:200  
 IL-17A PE / BioLegend / 506904 / TC11-18H10.1 / B173240/1:200  
 IL-21 Recombinant mouse IL-21R Fc Chimera / R&D / 596-MR //EFS0417031/1:40  
 R-Phycoerythrin AffiniPure F(ab')<sub>2</sub> Fragment Goat Anti-Human IgG, Fcy Fragment Specific / Jackson Immuno Research / 109-116-098 / Polyclonal / 111933/1:200  
 CD3 APC-Cy7 / BioLegend / 300426 / UCHT1 / B214151/1:200  
 CD4 PE / eBioscience / 12-0049042 / RPA-T4 / 4298927/1:200  
 CD45RA FITC / BioLegend / 304106 / HI100/1:200  
 CD45RO PE-Cy7 / BioLegend / 304230 / UCHL1 / B160500/1:200  
 CD62L PE-CF594 / BD Biosciences / 562301 / DREG-56/1:200  
 CD197 (CCR7) PerCP-Cy5.5 / BioLegend / 353220 / G043H7 / B198880/1:200  
 pY STAT1 (pY701) FITC / BD Biosciences / 612596 / 4a / 6078703/1:10  
 pY-STAT3 (pY705) PE / BD Biosciences / 557815 / 4\_P-STAT3 / 5309547/1:10  
 pY-STAT5 (pY694) 488/BD Biosciences / 612598 / 47/Stat5 / 5212980/1:10  
 pS-STAT1 (pS727) FITC / BD Biosciences / 560191 / K51-856 / 5141653/1:10  
 pS STAT3 (pS727) PE / BD Biosciences / 558557 / 49\_p-Stat3 / 4269803/1:10  
 Ptpn2 / R&D Systems / AF1930 / Polyclonal / 1:50

## Validation

Antibody validation was based on descriptions provided by the manufacturer. Concentrations were derived from preliminary dose dependent assessments - based on our own pilot studies and on-going experience. Where appropriate, studies used isotype control antibodies as described.

- Santa Cruz antibodies:

STAT1: sc-592

STAT3: sc-482

Both of them were validated in our laboratory by ChIP-qPCR (see supplemental material) but they have been used in many different laboratories for the same technique:

1. Iwata, S., et al. (2017). "The Transcription Factor T-bet Limits Amplification of Type I IFN Transcriptome and Circuitry in T Helper 1 Cells." *Immunity* 46(6): 983-991 e984.
2. Mahendrarajah, N., et al. (2017). "HSP90 is necessary for the ACK1-dependent phosphorylation of STAT1 and STAT3." *Cell Signal* 39: 9-17.
3. Hirahara, K., et al. (2015). "Asymmetric Action of STAT Transcription Factors Drives Transcriptional Outputs and Cytokine Specificity." *Immunity* 42(5): 877-889.
4. Nakayama, S., et al. (2014). "Type I IFN induces binding of STAT1 to Bcl6: divergent roles of STAT family transcription factors in the T follicular helper cell genetic program." *J Immunol* 192(5): 2156-2166.
5. Hutchins, A. P., et al. (2012). "Genome-wide analysis of STAT3 binding in vivo predicts effectors of the anti-inflammatory response in macrophages." *Blood* 119(13): e110-119.

- BD Biosciences: Flow cytometry antibodies are routinely tested by the company.

CD3 APC-Cy7: 560590

TCR APC: 553174

CD62L PE-CF594: 562301

pY STAT1 (pY701) FITC: 612596

pY-STAT3 (pY705) PE: 557815

pY-STAT5 (pY694) 488: 612598

pS-STAT1 (pS727) FITC: 560191

pS STAT3 (pS727) PE: 558557

- eBioscience (now in ThermoFisher Scientific): Validation standards for reproducibility

Thermo Fisher Scientific is committed to adopting validation standards for our antibody portfolio that are tested for both target specificity and functional application. By supporting the International Working Group for Antibody Validation (IWGAV), and adopting their recommendations, we're doing our part to ensure reproducibility and proper functionality in the scientific community.

CD4 PerPCP-Cy5.5: 45- 0042-82

CD25 PE: 12-0251-83

CD44 APC: 17-0441-83

CD62L FITC: 11-0621-85

CD127 PE-Cyanine7: 25-1271-82

IFNgamma eFluor450: 48-7311-80

IL-4 PE: 12-7041-82

CD4 PE: 12-0049042

CD62L PE-Texas: RM4317

- Biolegend antibodies: Each lot of these antibodies are quality control tested and/or validated by immunofluorescent staining with flow cytometric analysis. (<https://www.biolegend.com/en-us/advanced-search?GroupID=&PageNum=1&PID=81&isLiveSearch=true&Applications=KO%2fKD-WB>)

CD126 APC: 115812  
 IL-17A PE: 506904  
 CD3 APC-Cy7: 300426  
 CD45RA FITC: 304106  
 CD45RO PE-Cy7: 304230  
 CD197 (CCR7) PerCP-Cy5.5: 353220

- R&D Systems antibody: Flow cytometry antibodies are routinely tested by the company.  
 gp130 APC: FAB4681A

References:

1. Narazaki, M. et al. (1993) Blood 82:1120.
2. Taga, T. and T. Kishimoto (1997) Annu. Rev. Immunol. 15:797.

- IL-21 Recombinant mouse IL-21R Fc Chimera (R&D) and R-Phycoerythrin AffiniPure F(ab')<sub>2</sub> Fragment Goat Anti-Human IgG, Fcγ Fragment Specific (Jackson Immuno Research): Both of them were validated in our laboratory and also has been used in other laboratories:

1. Suto A., et al. (2008). "Development and characterization of IL-21-producing CD4+ T cells." J Exp Med 205(6):1369-79.

- Ptpn2 (R&D Systems):

For Flow cytometry isotype control antibodies was used. For immunohistochemistry also we stained with an IgG control and antibody concentration was assessed.

## Eukaryotic cell lines

Policy information about [cell lines](#)

Cell line source(s)

CHO cell line

Authentication

Cell line was used by Biovan company: Biovan facilities are EMA certified and FDA inspected for cGMP production of investigational and commercial products.

Mycoplasma contamination

Cell line was used by Biovan company: Biovan facilities are EMA certified and FDA inspected for cGMP production of investigational and commercial products.

Commonly misidentified lines  
 (See [ICLAC](#) register)

Cell line was used by Biovan company: Biovan facilities are EMA certified and FDA inspected for cGMP production of investigational and commercial products.

## Animals and other organisms

Policy information about [studies involving animals](#); [ARRIVE guidelines](#) recommended for reporting animal research

Laboratory animals

- Inbred 8-10 weeks wild type C57BL/6 male mice were purchased from Charles River UK.  
 - C57BL/6 IL-6 receptor deficient mice (Il6ra<sup>-/-</sup>) mice were bred under approved UK Home Office guidelines in Cardiff University. Male mice were used for experiments at the age of 8-10 weeks.  
 - Ptpn2f/fl, Lck-Cre:Ptpn2f/fl, and Ptpn22<sup>-/-</sup> mice were bred and housed at the Peter MacCallum Cancer Centre (Melbourne, Australia). All male mice were 8-12 weeks of age.

Wild animals

The study did not involve wild animals

Field-collected samples

The study did not involve samples collected from the field

Ethics oversight

Inbred wild type C57BL/6 male mice were purchased from Charles River UK. C57BL/6 IL-6 receptor deficient mice (Cd126<sup>-/-</sup>) mice have been described previously and were bred under approved UK Home Office guidelines in Cardiff University<sup>7</sup>. Ptpn2f/fl, Lck-Cre:Ptpn2f/fl, and Ptpn22<sup>-/-</sup> mice were bred and housed at the Peter MacCallum Cancer Centre (Melbourne, Australia). All procedures were performed in accordance with the NHMRC Australian Code of Practice for the Care and Use of Animals, and approved by the Peter MacCallum Animal Ethics and Experimentation Committee (Ethics number: AEEC 570). Antigen-induced arthritis was performed under the UK Home Office-approved project licences PPL 30/2928 and PB3E4EE13.

Note that full information on the approval of the study protocol must also be provided in the manuscript.

## Human research participants

Policy information about [studies involving human research participants](#)

Population characteristics

- 3 healthy Caucasian male, age between 35-50 for Flow cytometry analysis.  
 - 87 synovial samples were acquired through a minimally invasive US-guided synovial biopsy from patients presenting with early RA naïve to therapy from the Pathobiology of Early Arthritis Cohort (PEAC). Ethical approval was granted by the King's College Hospital Research Ethics Committee (REC 05/Q0703/198) for RNA - seq and histology. The cohort has more females (80%) than males, this was not planned but is a reflection of the increased prevalence of rheumatoid arthritis in female (<http://www.peac-mrc.mds.qmul.ac.uk/docs.php>). All patients underwent ultrasound-guided synovial biopsy of an affected joint at baseline.

Sections of paraffin embedded RA synovial tissue were stained with standard Haematoxylin and Eosin (H&E) and graded as either a lymphoid, myeloid or fibroid phenotypes.

#### Recruitment

- Healthy male: request was circulated around the university for healthy participants  
 - Synovial samples: recruitment protocol from the Pathobiology of Early Arthritis Cohort (PEAC) (<http://www.peac-mrc.mds.qmul.ac.uk/docs/RECRUITMENT%20-%20Protected.pdf>). As described above, the cohort has more females (80%) than males due to the increased prevalence of rheumatoid arthritis in female; that could be a bias factor for the results.

#### Ethics oversight

Ethical approval was granted by the King's College Hospital Research Ethics Committee (REC 05/Q0703/198).

Note that full information on the approval of the study protocol must also be provided in the manuscript.

## ChIP-seq

### Data deposition

- Confirm that both raw and final processed data have been deposited in a public database such as [GEO](#).
- Confirm that you have deposited or provided access to graph files (e.g. BED files) for the called peaks.

#### Data access links

*May remain private before publication.*

Submitted to ArrayExpress - <https://www.ebi.ac.uk/arrayexpress/experiments/E-MTAB-6273/>

Username: Reviewer\_E-MTAB-6273

Password: 7tBavowV

#### Files in database submission

BAM

S1.Nv.IL6.Input  
 S1.Nv.IL6.IP  
 S1.EM.IL6.Input  
 S1.EM.IL6.IP  
 S3.Nv.IL6.Input  
 S3.Nv.IL6.IP  
 S3.EM.IL6.Input  
 S3.EM.IL6.IP

#### Genome browser session (e.g. [UCSC](#))

[http://www.ensembl.org/Mus\\_musculus/Gene/Summary?db=core;g=ENSMUSG00000004040;r=11:100885098-100939540](http://www.ensembl.org/Mus_musculus/Gene/Summary?db=core;g=ENSMUSG00000004040;r=11:100885098-100939540)

Log in: JonesSA@cardiff.ac.uk

Password: reviewer2018

## Methodology

#### Replicates

One replicate per sample with the ChIP-qPCR validation (supplemental data) for each sample and ChIP (STAT1 and STAT3). Samples were obtained after sorting and treated with IL-6 [20ng/ml] for 30 min:  
 Naive CD4 T-cells: S1.Nv.IL6.Input - S1.Nv.IL6.IP - S3.Nv.IL6.Input - S3.Nv.IL6.IP  
 Effector memory CD4 T-cells: S1.EM.IL6.Input - S1.EM.IL6.IP - S3.EM.IL6.Input - S3.EM.IL6.IP

#### Sequencing depth

Library preparation followed the manufacturer's recommended protocol (Ion ChIP-Seq Library Preparation on the Ion Proton System. Publication Number 4473623 (Revision B)).

For the amplification PCR we used as it is suggested:  
 Nick repair -72°C for 20 min  
 Denature - 95°C for 5 min  
 Cycling (18 cycles) - 97°C 15 sec, 60°C 15 sec and 70°C for 1 min  
 Holding - 70°C for 5 min and 4°C ∞

The sequencing coverage was the following:  
 Sample name - total reads - mapped reads - reads length (bp)  
 S1.Nv.IL6.Input - 75818935 - 71155423 - 169  
 S1.Nv.IL6.IP - 74584503 - 65458907 - 167  
 S3.Nv.IL6.Input - 48912438 - 48362832 - 154  
 S3.Nv.IL6.IP - 57492786 - 52997712 - 161  
 S1.EM.IL6.Input - 52430613 - 40704114 - 130  
 S1.EM.IL6.IP - 53318561 - 31330388 - 138  
 S3.EM.IL6.Input - 44336863 - 35004431 - 134  
 S3.EM.IL6.IP - 61400306 - 41996444 - 142

#### Antibodies

The antibodies used for ChIP-seq are:

Protein name / Supplier / Catalog number / Clone / Lot number  
 STAT1 / Santa Cruz Biotechnology / sc-592 / p84-p91/ K0414  
 STAT3 / Santa Cruz Biotechnology / sc-482 / C-20/ D1315

Both of them were validated in our laboratory by ChIP-qPCR (see supplemental material) but they have been used in many different laboratories for the same technique:

1. Iwata, S., et al. (2017). "The Transcription Factor T-bet Limits Amplification of Type I IFN Transcriptome and Circuitry in T Helper 1 Cells." *Immunity* 46(6): 983-991 e984.
2. Mahendrarajah, N., et al. (2017). "HSP90 is necessary for the ACK1-dependent phosphorylation of STAT1 and STAT3." *Cell Signal* 39: 9-17.
3. Hirahara, K., et al. (2015). "Asymmetric Action of STAT Transcription Factors Drives Transcriptional Outputs and Cytokine Specificity." *Immunity* 42(5): 877-889.
4. Nakayamada, S., et al. (2014). "Type I IFN induces binding of STAT1 to Bcl6: divergent roles of STAT family transcription factors in the T follicular helper cell genetic program." *J Immunol* 192(5): 2156-2166.
5. Hutchins, A. P., et al. (2012). "Genome-wide analysis of STAT3 binding in vivo predicts effectors of the anti-inflammatory response in macrophages." *Blood* 119(13): e110-119.

#### Peak calling parameters

```
HOMER: default parameters used

# preprocessing
makeTagDirectory tag.dir rmdup.bam -format sam

# peak finding
findPeaks tag.dir -style factor -o peaks.out -i tag.input -F 4 -P 0.0001 -fdr 0.05

# catering for transcription factor binding, peak calling
-style factor
# peak fold-enrichment (default value used 4)
-F 4
# poisson p-value threshold (default value used 0.0001)
-P 0.0001
# false discovery rate
-fdr 0.05
```

#### Data quality

```
Fold-enrichment = 4 (software published default value).
FDR = 0.05.
For these parameters, number of peaks called per condition:
S1.Nv.IL6.IP vs S1.Nv.IL6.Input = 2952
S1.EM.IL6.IP vs S1.EM.IL6.Input = 954
S3.Nv.IL6.IP vs S3.Nv.IL6.Input = 1056
S3.EM.IL6.IP vs S3.EM.IL6.Input = 1085
```

#### Software

```
# Reads from the Ion Proton where mapped in situ using company-supplied software and default settings
bowtie2

# Sequencing read quality assessment
fastqc

# Duplicate read filtering
picard-tools MarkDuplicates
samtools

# Duplicate read quality assessment
bamtools

# bam to bigwig conversion for data visualisation
bedtools
bedGraphToBigWig

# data visualisation
IGV

# peaking calling
Homer findPeaks
```

## Plots

Confirm that:

- The axis labels state the marker and fluorochrome used (e.g. CD4-FITC).
- The axis scales are clearly visible. Include numbers along axes only for bottom left plot of group (a 'group' is an analysis of identical markers).
- All plots are contour plots with outliers or pseudocolor plots.
- A numerical value for number of cells or percentage (with statistics) is provided.

## Methodology

Sample preparation

Murine CD4 T-cells from total splenocytes were enriched by negative magnetic selection (Miltenyi Biotec) before purification of naïve (CD4+CD25-CD44loCD62LhiCD127hi), central memory (CD4+CD25-CD44hiCD62LhiCD127hi), effector (CD4+CD25-CD44loCD62LloCD127lo-int) or effector memory (CD4+CD25-CD44hiCD62LloCD127int-hi) T-cells using a BD FACS ARIA II (BD Biosciences)

Instrument

BD FACS ARIA II (BD Biosciences) was used for sorting cells. After the experiments cells were acquired on a CyAn ADP analyzer (Beckman-Coulter) or BD FACS CANTO II (BD Biosciences)

Software

To collect the data we used Summit (software v4.3, Beckman-Coulter) or ImageStream imaging flow cytometer (Amnis). We analyzed the acquired samples with Summit using FlowJo 10 (TreeStar) and software IDEAS for the ImageStream samples.

Cell population abundance

We calculate the purity of our sorted populations running the samples after sorting. T-cell subset purity was >98%. Example of the purity strategy used is in the Supplementary information.

Gating strategy

1. FSC/SSC gates were used to selected live-lymphocyte population.
2. FSC-H/FSC-A was used to indicate the singlets.
3. CD4-PerCP-Cy5.5 positive vs CD25-PE negative cells were used from here to select CD4 Tcells.
4. Using the markers CD62L vs CD44 we were able to sort the 4 different populations:  
naïve: CD4+ CD25- CD44low CD62Lhigh  
central memory CD4+ CD25- CD44high CD62Lhigh  
effector CD4+ CD25- CD44low CD62Llow  
effector memory CD4+ CD25- CD44high CD62Llow

An example of the gating used is in the Supplementary information

- Tick this box to confirm that a figure exemplifying the gating strategy is provided in the Supplementary Information.
