# Supplementary material
Source: PubMed Central journal article supplement (PMC7610646)
Supplement: EMS81865-supplement-Supplementary_Tables.pdf [file EMS81865-supplement-Supplementary_Tables.pdf]

**Supplemental Table 1- Statistical evaluation of Chip-seq datasets:** Comparison of Chip-seq datasets against Affymetrix gene expression (relative significance;  $-(\log_{10}(\text{adjusted p-value}))$ ).

**Naïve STAT1 Chip-seq vs Affimetrix**

| Gene Name            | ChIP-seq p-val | Affymetrix p-val | ENSEMBL            |
|----------------------|----------------|------------------|--------------------|
| <i>1700012I11Rik</i> | 4.7            |                  | ENSMUSG00000102069 |
| <i>1700041G16Rik</i> | 6.64           | 0.006789         | ENSMUSG00000054822 |
| <i>1700047K16Rik</i> | 6.95           | 0.010971         | ENSMUSG00000087347 |
| <i>2310034G01Rik</i> | 5.66           | 0.043999         | ENSMUSG00000099655 |
| <i>2310057J18Rik</i> | 7.87           | 0.001508         | ENSMUSG00000015519 |
| <i>2900076A07Rik</i> | 5.66           | 0.518923         | ENSMUSG00000097277 |
| <i>4922502D21Rik</i> | 4.59           |                  | ENSMUSG00000047720 |
| <i>4930441J16Rik</i> | 5.41           | 0.034997         | ENSMUSG00000085405 |
| <i>4930449I04Rik</i> | 5.66           |                  | ENSMUSG00000105459 |
| <i>4930528D03Rik</i> | 4.9            | 0.000818         | ENSMUSG00000097502 |
| <i>4933431K14Rik</i> | 4.59           |                  | ENSMUSG00000103715 |
| <i>5830468F06Rik</i> | 5.78           |                  | ENSMUSG00000098322 |
| <i>9030624J02Rik</i> | 8.86           | 0.36822          | ENSMUSG00000030982 |
| <i>9330118I20Rik</i> | 7.29           |                  | ENSMUSG00000108242 |
| <i>9330175E14Rik</i> | 11.84          | 0.904999         | ENSMUSG00000097194 |
| <i>9930014A18Rik</i> | 4.59           |                  | ENSMUSG00000097493 |
| <i>A930002H24Rik</i> | 4.03           | 0.053945         | ENSMUSG00000045506 |
| <i>A930004D18Rik</i> | 5.66           | 0.060846         | ENSMUSG00000054057 |
| <i>AC099934.1</i>    | 4.59           |                  | ENSMUSG00000105788 |
| <i>AC099934.2</i>    | 4.59           |                  | ENSMUSG00000106279 |
| <i>Actn2</i>         | 4.03           | 2.612822         | ENSMUSG00000052374 |
| <i>Adar</i>          | 11.84          | 1.145666         | ENSMUSG00000027951 |
| <i>Adck4</i>         | 4.03           | 0.230364         | ENSMUSG00000003762 |
| <i>Adtrp</i>         | 6.95           | 0.009183         | ENSMUSG00000058022 |
| <i>Akt2</i>          | 8.86           | 7.02101          | ENSMUSG00000004056 |
| <i>Aldh7a1</i>       | 4.7            | 0.000138         | ENSMUSG00000053644 |

|                 |       |          |                    |
|-----------------|-------|----------|--------------------|
| <i>Api5</i>     | 10.92 | 0.117821 | ENSMUSG00000027193 |
| <i>Apobr</i>    | 6.06  | 0.001528 | ENSMUSG00000042759 |
| <i>Arap2</i>    | 4.7   | 0.000138 | ENSMUSG00000037999 |
| <i>Arfgef1</i>  | 4.9   | 0.012322 | ENSMUSG00000067851 |
| <i>Arid5a</i>   | 4.7   | 8.702858 | ENSMUSG00000037447 |
| <i>Arl6ip1</i>  | 6.06  | 0.013833 | ENSMUSG00000030654 |
| <i>Armc4</i>    | 4.03  | 0.044523 | ENSMUSG00000061802 |
| <i>Arnt</i>     | 6.95  | 0.184616 | ENSMUSG00000015522 |
| <i>Art3</i>     | 6.9   | 0.006789 | ENSMUSG00000034842 |
| <i>Aspa</i>     | 13.67 | 0.018571 | ENSMUSG00000020774 |
| <i>Astn1</i>    | 4.7   | 0.000786 | ENSMUSG00000026587 |
| <i>B2m</i>      | 14.85 | 0.008185 | ENSMUSG00000060802 |
| <i>BC029722</i> | 4.7   |          | ENSMUSG00000074649 |
| <i>BC051226</i> | 8.92  | 2.877587 | ENSMUSG00000092564 |
| <i>Bpifc</i>    | 6.46  | 0.000138 | ENSMUSG00000050108 |
| <i>Bst2</i>     | 16.82 | 0.01543  | ENSMUSG00000046718 |
| <i>Car5a</i>    | 6.95  | 0.004091 | ENSMUSG00000025317 |
| <i>Ccdc126</i>  | 6.46  | 0.171841 | ENSMUSG00000050786 |
| <i>Ccdc175</i>  | 4.7   | 0.040234 | ENSMUSG00000021086 |
| <i>Ccng2</i>    | 4.59  | 0.36896  | ENSMUSG00000029385 |
| <i>Cd274</i>    | 19.72 | 0.569487 | ENSMUSG00000016496 |
| <i>Cd6</i>      | 4.9   | 8.414268 | ENSMUSG00000024670 |
| <i>Cdc25b</i>   | 6.46  | 4.580325 | ENSMUSG00000027330 |
| <i>Cdc42ep2</i> | 9.95  | 0.003727 | ENSMUSG00000045664 |
| <i>Cdk5rap2</i> | 4.9   | 0.01543  | ENSMUSG00000039298 |
| <i>Cdk5rap3</i> | 6.95  | 0.022797 | ENSMUSG00000018669 |
| <i>Cep164</i>   | 5.41  | 0.100256 | ENSMUSG00000043987 |
| <i>Cflar</i>    | 6.14  | 0.009684 | ENSMUSG00000026031 |
| <i>Cldn1</i>    | 6.46  | 0.092124 | ENSMUSG00000022512 |
| <i>Clmp</i>     | 4.9   | 0.021495 | ENSMUSG00000032024 |

|                      |       |          |                    |
|----------------------|-------|----------|--------------------|
| <i>Cln3</i>          | 6.06  | 0.892325 | ENSMUSG00000030720 |
| <i>Cltc</i>          | 6.14  | 0.118952 | ENSMUSG00000047126 |
| <i>Cmpk2</i>         | 13.67 | 0.059122 | ENSMUSG00000020638 |
| <i>Cmtr1</i>         | 22.65 | 0.007619 | ENSMUSG00000024019 |
| <i>Cnnm2</i>         | 5.66  | 0.116884 | ENSMUSG00000064105 |
| <i>Cnot3</i>         | 5.66  | 0.039865 | ENSMUSG00000035632 |
| <i>Cnot4</i>         | 6.06  | 0.008276 | ENSMUSG00000038784 |
| <i>Cox4i2</i>        | 4.03  | 0.006115 | ENSMUSG00000009876 |
| <i>Crabp2</i>        | 4.7   | 0.068034 | ENSMUSG00000004885 |
| <i>Crebrf</i>        | 6.64  | 0.001887 | ENSMUSG00000048249 |
| <i>Ctsa</i>          | 4.7   | 7.72896  | ENSMUSG00000017760 |
| <i>Cttnbp2</i>       | 4.7   | 0.000138 | ENSMUSG00000000416 |
| <i>Cuta</i>          | 5.41  | 0.605567 | ENSMUSG00000024194 |
| <i>D030028A08Rik</i> | 6.95  | 2.414076 | ENSMUSG00000078700 |
| <i>D930028M14Rik</i> | 12.28 | 0.023803 | ENSMUSG00000074274 |
| <i>Daxx</i>          | 8.92  | 0.046596 | ENSMUSG00000002307 |
| <i>Dcaf6</i>         | 8.15  | 0.01543  | ENSMUSG00000026571 |
| <i>Ddr1</i>          | 6.95  | 0.001887 | ENSMUSG00000003534 |
| <i>Ddx18</i>         | 4.7   | 0.012743 | ENSMUSG00000001674 |
| <i>Ddx24</i>         | 7.79  | 0.656436 | ENSMUSG00000041645 |
| <i>Ddx51</i>         | 9.81  | 0.006679 | ENSMUSG00000029504 |
| <i>Dis3</i>          | 4.03  | 0.007855 | ENSMUSG00000033166 |
| <i>Dlc1</i>          | 5.66  | 0.071223 | ENSMUSG00000031523 |
| <i>Dolk</i>          | 4.7   | 0.007209 | ENSMUSG00000075419 |
| <i>Dot1l</i>         | 5.66  | 0.001449 | ENSMUSG00000061589 |
| <i>Dtx3l</i>         | 20    | 2.217093 | ENSMUSG00000049502 |
| <i>Eef2</i>          | 4.59  | 0.007855 | ENSMUSG00000034994 |
| <i>Eif1a</i>         | 7.87  | 1.32387  | ENSMUSG00000057561 |
| <i>Eif2s2</i>        | 5.66  | 0.004091 | ENSMUSG00000074656 |
| <i>Elmo2</i>         | 19.73 | 6.533649 | ENSMUSG00000017670 |

|                |       |          |                    |
|----------------|-------|----------|--------------------|
| <i>Emc1</i>    | 4.7   | 0.069976 | ENSMUSG00000078517 |
| <i>Epc1</i>    | 4.7   | 0.413248 | ENSMUSG00000024240 |
| <i>Epha7</i>   | 5.66  | 0.006215 | ENSMUSG00000028289 |
| <i>Esp38</i>   | 4.03  | 0.238263 | ENSMUSG00000095886 |
| <i>Ezr</i>     | 10.92 | 0.002099 | ENSMUSG00000052397 |
| <i>Fam159b</i> | 6.77  | 0.044886 | ENSMUSG00000042655 |
| <i>Fam84b</i>  | 4.59  | 0.006115 | ENSMUSG00000072568 |
| <i>Fgf12</i>   | 5.66  | 0.004091 | ENSMUSG00000022523 |
| <i>Frs2</i>    | 4.9   | 0.01857  | ENSMUSG00000020170 |
| <i>Fto</i>     | 5.66  | 0.024374 | ENSMUSG00000055932 |
| <i>Gbas</i>    | 6.06  | 0.016497 | ENSMUSG00000029432 |
| <i>Gbp6</i>    | 25.12 | 0.191536 | ENSMUSG00000104713 |
| <i>Gbp7</i>    | 10.22 | 1.675614 | ENSMUSG00000040253 |
| <i>Gdap10</i>  | 18.87 | 0.035035 | ENSMUSG00000096954 |
| <i>Ggnbp1</i>  | 8.51  | 0.000604 | ENSMUSG00000048731 |
| <i>Ghitm</i>   | 4.9   | 0.001887 | ENSMUSG00000041028 |
| <i>Gm10125</i> | 5.41  | 0.002804 | ENSMUSG00000063087 |
| <i>Gm10715</i> | 5.93  |          | ENSMUSG00000096201 |
| <i>Gm11346</i> | 10.22 | 0.012801 | ENSMUSG00000085603 |
| <i>Gm11696</i> | 6.14  | 0.01079  | ENSMUSG00000056687 |
| <i>Gm12185</i> | 13.16 | 0.731536 | ENSMUSG00000048852 |
| <i>Gm12252</i> | 5.93  |          | ENSMUSG00000082181 |
| <i>Gm12715</i> | 4.03  | 0.013833 | ENSMUSG00000059195 |
| <i>Gm13453</i> | 5.66  | 0.132667 | ENSMUSG00000083240 |
| <i>Gm13466</i> | 4.03  |          | ENSMUSG00000083807 |
| <i>Gm15643</i> | 8.86  | 0.012472 | ENSMUSG00000085970 |
| <i>Gm15927</i> | 5.66  | 0.000604 | ENSMUSG00000085039 |
| <i>Gm16000</i> | 4.03  |          | ENSMUSG00000085106 |
| <i>Gm16174</i> | 9.35  | 7.632426 | ENSMUSG00000087593 |
| <i>Gm19412</i> | 5.13  | 0.498243 | ENSMUSG00000101438 |

|                |       |         |                    |
|----------------|-------|---------|--------------------|
| <i>Gm20743</i> | 6.95  | 0.00254 | ENSMUSG00000104117 |
| <i>Gm21542</i> | 4.9   |         | ENSMUSG00000098010 |
| <i>Gm22371</i> | 5.66  |         | ENSMUSG00000077776 |
| <i>Gm22383</i> | 4.03  |         | ENSMUSG00000088813 |
| <i>Gm22456</i> | 8.86  |         | ENSMUSG00000064512 |
| <i>Gm22845</i> | 4.9   |         | ENSMUSG00000088337 |
| <i>Gm23318</i> | 4.59  |         | ENSMUSG00000088625 |
| <i>Gm24044</i> | 4.7   |         | ENSMUSG00000065041 |
| <i>Gm24737</i> | 4.03  |         | ENSMUSG00000089486 |
| <i>Gm24794</i> | 4.59  |         | ENSMUSG00000077476 |
| <i>Gm25053</i> | 6.95  |         | ENSMUSG00000099002 |
| <i>Gm25053</i> | 6.95  |         | ENSMUSG00000106585 |
| <i>Gm25264</i> | 6.46  |         | ENSMUSG00000089144 |
| <i>Gm25602</i> | 6.14  |         | ENSMUSG00000088987 |
| <i>Gm25857</i> | 5.78  |         | ENSMUSG00000064722 |
| <i>Gm26448</i> | 4.7   |         | ENSMUSG00000064380 |
| <i>Gm26603</i> | 5.66  |         | ENSMUSG00000097857 |
| <i>Gm27005</i> | 5.66  |         | ENSMUSG00000098103 |
| <i>Gm28388</i> | 12.24 |         | ENSMUSG00000099882 |
| <i>Gm28529</i> | 4.7   |         | ENSMUSG00000101320 |
| <i>Gm28982</i> | 6.64  |         | ENSMUSG00000101832 |
| <i>Gm29053</i> | 6.95  |         | ENSMUSG00000100156 |
| <i>Gm29170</i> | 15.1  |         | ENSMUSG00000100455 |
| <i>Gm29609</i> | 7.79  |         | ENSMUSG00000101678 |
| <i>Gm29856</i> | 6.95  |         | ENSMUSG00000102432 |
| <i>Gm33994</i> | 4.9   |         | ENSMUSG00000104509 |
| <i>Gm36951</i> | 6.14  |         | ENSMUSG00000104130 |
| <i>Gm37042</i> | 6.45  |         | ENSMUSG00000103457 |
| <i>Gm37123</i> | 4.59  |         | ENSMUSG00000103039 |
| <i>Gm38180</i> | 6.95  |         | ENSMUSG00000103684 |

|                |       |          |                    |
|----------------|-------|----------|--------------------|
| <i>Gm38318</i> | 6.06  |          | ENSMUSG00000102989 |
| <i>Gm43262</i> | 4.9   |          | ENSMUSG00000107305 |
| <i>Gm43302</i> | 25.12 |          | ENSMUSG00000079362 |
| <i>Gm43808</i> | 8.83  |          | ENSMUSG00000107086 |
| <i>Gm43869</i> | 4.9   |          | ENSMUSG00000108008 |
| <i>Gm43886</i> | 5.66  |          | ENSMUSG00000107515 |
| <i>Gm44437</i> | 4.9   |          | ENSMUSG00000108102 |
| <i>Gm44615</i> | 6.46  |          | ENSMUSG00000108363 |
| <i>Gm45139</i> | 6.14  |          | ENSMUSG00000108495 |
| <i>Gm5185</i>  | 6.14  |          | ENSMUSG00000058933 |
| <i>Gm5310</i>  | 4.03  |          | ENSMUSG00000105248 |
| <i>Gm7656</i>  | 4.7   |          | ENSMUSG00000097991 |
| <i>Gm7858</i>  | 4.9   |          | ENSMUSG00000101726 |
| <i>Gm8000</i>  | 6.45  |          | ENSMUSG00000101132 |
| <i>Gm8099</i>  | 6.95  |          | ENSMUSG00000105787 |
| <i>Gm9274</i>  | 7.79  |          | ENSMUSG00000098095 |
| <i>Gm9939</i>  | 8.86  |          | ENSMUSG00000054247 |
| <i>Gna13</i>   | 6.14  | 0.026634 | ENSMUSG00000020611 |
| <i>Gpnmb</i>   | 4.7   | 0.184266 | ENSMUSG00000029816 |
| <i>Grid2</i>   | 7.29  | 0.150619 | ENSMUSG00000071424 |
| <i>Gsap</i>    | 5.41  | 0.848207 | ENSMUSG00000039934 |
| <i>Gtf2a2</i>  | 6.46  | 0.101279 | ENSMUSG00000033543 |
| <i>Gtf2h1</i>  | 11.08 | 0.01137  | ENSMUSG00000006599 |
| <i>Gtf3c2</i>  | 7.79  | 0.305108 | ENSMUSG00000106864 |
| <i>Gtpbp10</i> | 5.66  | 0.008584 | ENSMUSG00000040464 |
| <i>H2-K1</i>   | 4.03  | 0.057192 | ENSMUSG00000061232 |
| <i>H2-T24</i>  | 26.52 | 0.208997 | ENSMUSG00000053835 |
| <i>Helz2</i>   | 12.82 | 0.170472 | ENSMUSG00000027580 |
| <i>Hnrnp1</i>  | 5.66  | 0.060846 | ENSMUSG00000015165 |
| <i>Hps5</i>    | 11.08 | 0.006769 | ENSMUSG00000014418 |

|                  |       |          |                    |
|------------------|-------|----------|--------------------|
| <i>Hsh2d</i>     | 12.28 | 0.18011  | ENSMUSG00000062007 |
| <i>Ibtk</i>      | 4.59  | 0.936737 | ENSMUSG00000035941 |
| <i>Icam1</i>     | 5.13  | 12.96573 | ENSMUSG00000037405 |
| <i>Id3</i>       | 4.7   | 5.079505 | ENSMUSG00000007872 |
| <i>Ifi27</i>     | 25.82 | 0.03005  | ENSMUSG00000064215 |
| <i>Ifit1</i>     | 6.14  | 0.053945 | ENSMUSG00000034459 |
| <i>Ifit1bl2</i>  | 6.14  |          | ENSMUSG00000067297 |
| <i>Ift122</i>    | 4.9   | 0.732022 | ENSMUSG00000030323 |
| <i>Igf1</i>      | 12.28 | 0.00717  | ENSMUSG00000020053 |
| <i>Igkv1-132</i> | 4.7   |          | ENSMUSG00000096580 |
| <i>Igtp</i>      | 11.06 | 2.001568 | ENSMUSG00000078853 |
| <i>Incenp</i>    | 4.9   | 0.012472 | ENSMUSG00000024660 |
| <i>Iqca</i>      | 7.87  | 0.020437 | ENSMUSG00000026301 |
| <i>Irf1</i>      | 5.93  | 8.225396 | ENSMUSG00000018899 |
| <i>Irf7</i>      | 9.59  | 0.630249 | ENSMUSG00000025498 |
| <i>Irf8</i>      | 6.9   | 5.648034 | ENSMUSG00000041515 |
| <i>Irf9</i>      | 32.13 | 8.155709 | ENSMUSG00000002325 |
| <i>Irgm1</i>     | 39.75 | 0.058998 | ENSMUSG00000046879 |
| <i>Irgm2</i>     | 11.06 | 0.182716 | ENSMUSG00000069874 |
| <i>Isg15</i>     | 7.69  | 0.075538 | ENSMUSG00000035692 |
| <i>Itpka</i>     | 5.78  | 0.01543  | ENSMUSG00000027296 |
| <i>Itpril1</i>   | 6.46  | 0.01605  | ENSMUSG00000074825 |
| <i>Jmjd4</i>     | 6.46  | 0.026418 | ENSMUSG00000036819 |
| <i>Kdm3a</i>     | 8.86  | 0.026711 | ENSMUSG00000053470 |
| <i>Klf9</i>      | 5.66  | 0.127614 | ENSMUSG00000033863 |
| <i>Klhl3</i>     | 6.9   | 4.208569 | ENSMUSG00000014164 |
| <i>Kmt2d</i>     | 4.59  | 0.02068  | ENSMUSG00000048154 |
| <i>Lama2</i>     | 6.64  | 0.032147 | ENSMUSG00000019899 |
| <i>Lcorl</i>     | 5.66  | 0.020239 | ENSMUSG00000015882 |
| <i>Lct</i>       | 4.03  | 0.002804 | ENSMUSG00000026354 |

|                 |       |          |                    |
|-----------------|-------|----------|--------------------|
| <i>Lrit1</i>    | 4.59  | 0.05765  | ENSMUSG00000041044 |
| <i>Lrrc51</i>   | 5.78  | 0.068646 | ENSMUSG00000064307 |
| <i>Macf1</i>    | 4.59  | 0.832788 | ENSMUSG00000028649 |
| <i>Map2</i>     | 8.86  | 0.010529 | ENSMUSG00000015222 |
| <i>Med7</i>     | 15.11 | 0.189547 | ENSMUSG00000020397 |
| <i>Mef2c</i>    | 6.95  | 0.013833 | ENSMUSG00000005583 |
| <i>Mettl21a</i> | 6.64  | 0.001887 | ENSMUSG00000025956 |
| <i>Mgat4b</i>   | 4.59  | 0.022797 | ENSMUSG00000036620 |
| <i>Mif4gd</i>   | 5.24  | 0.070754 | ENSMUSG00000020743 |
| <i>Mir1893</i>  | 4.7   |          | ENSMUSG00000084514 |
| <i>Mir7671</i>  | 23.14 |          | ENSMUSG00000099153 |
| <i>Mitd1</i>    | 12.94 | 0.000207 | ENSMUSG00000026088 |
| <i>Mpc2</i>     | 8.15  | 0.044865 | ENSMUSG00000026568 |
| <i>Mrpl13</i>   | 5.41  | 0.000604 | ENSMUSG00000022370 |
| <i>Mrpl30</i>   | 12.94 | 0.020125 | ENSMUSG00000026087 |
| <i>Mrpl39</i>   | 8.83  | 0.438611 | ENSMUSG00000022889 |
| <i>Mrto4</i>    | 4.7   | 0.020437 | ENSMUSG00000028741 |
| <i>Mtbp</i>     | 5.41  | 0.687249 | ENSMUSG00000022369 |
| <i>Myo18b</i>   | 4.59  | 0.001125 | ENSMUSG00000072720 |
| <i>Naa25</i>    | 6.46  | 0.006793 | ENSMUSG00000042719 |
| <i>Nampt</i>    | 18.87 | 0.00585  | ENSMUSG00000020572 |
| <i>Ndel1</i>    | 5.41  | 0.030766 | ENSMUSG00000018736 |
| <i>Neurl2</i>   | 4.7   | 0.01543  | ENSMUSG00000039873 |
| <i>Nfrkb</i>    | 5.66  | 0.032928 | ENSMUSG00000042185 |
| <i>Nisch</i>    | 6.06  | 0.039405 | ENSMUSG00000021910 |
| <i>Noc4l</i>    | 9.81  | 0.107295 | ENSMUSG00000033294 |
| <i>Npm1</i>     | 8.86  | 0.022797 | ENSMUSG00000057113 |
| <i>Nsfl1c</i>   | 12.24 | 0.01543  | ENSMUSG00000027455 |
| <i>Nsmce1</i>   | 5.41  | 0.802504 | ENSMUSG00000030750 |
| <i>Nup188</i>   | 4.7   | 0.01328  | ENSMUSG00000052533 |



|                    |       |          |                    |
|--------------------|-------|----------|--------------------|
| <i>Oas1b</i>       | 15.92 | 0.015958 | ENSMUSG00000029605 |
| <i>Oas1c</i>       | 15.92 | 1.071369 | ENSMUSG00000001166 |
| <i>Oas2</i>        | 14.63 | 2.486726 | ENSMUSG00000032690 |
| <i>Oasl2</i>       | 29.1  | 0.460778 | ENSMUSG00000029561 |
| <i>Ocel1</i>       | 9.95  | 0.340699 | ENSMUSG00000002396 |
| <i>Olf1427</i>     | 4.7   | 0.018537 | ENSMUSG00000067525 |
| <i>Olf1333-ps1</i> | 4.59  |          | ENSMUSG00000081287 |
| <i>Olf1429</i>     | 4.9   | 0.005027 | ENSMUSG00000049528 |
| <i>Olf1524</i>     | 5.66  | 0.005328 | ENSMUSG00000050366 |
| <i>Olf1647-ps1</i> | 6.06  |          | ENSMUSG00000083513 |
| <i>Oprm1</i>       | 6.46  | 0.033752 | ENSMUSG00000000766 |
| <i>Orai2</i>       | 5.66  | 0.653784 | ENSMUSG00000039747 |
| <i>Pafah2</i>      | 6.06  | 0.010669 | ENSMUSG00000037366 |
| <i>Parp10</i>      | 9.95  | 0.361352 | ENSMUSG00000063268 |
| <i>Parp11</i>      | 7.87  | 0.067573 | ENSMUSG00000037997 |
| <i>Parp9</i>       | 20    | 7.866322 | ENSMUSG00000022906 |
| <i>Pcf11</i>       | 6.14  | 0.090339 | ENSMUSG00000041328 |
| <i>Pemt</i>        | 6.95  | 0.000138 | ENSMUSG00000000301 |
| <i>Pex1</i>        | 6.95  | 0.017718 | ENSMUSG00000005907 |
| <i>Phax</i>        | 4.7   | 0.00254  | ENSMUSG00000008301 |
| <i>Phkg1</i>       | 4.7   | 0.030026 | ENSMUSG00000025537 |
| <i>Pibf1</i>       | 4.03  | 0.049683 | ENSMUSG00000022064 |
| <i>Pigo</i>        | 4.9   | 0.003221 | ENSMUSG00000028454 |
| <i>Pitpnc1</i>     | 5.41  | 0.030736 | ENSMUSG00000040430 |
| <i>Plce1</i>       | 5.66  | 0.00585  | ENSMUSG00000024998 |
| <i>Plgrkt</i>      | 19.72 | 0.833406 | ENSMUSG00000016495 |
| <i>Plscr1</i>      | 7.87  | 0.019318 | ENSMUSG00000032369 |
| <i>Pml</i>         | 7.39  | 0.005435 | ENSMUSG00000036986 |
| <i>Pnpt1</i>       | 15.89 | 0.004732 | ENSMUSG00000020464 |
| <i>Poln</i>        | 7.87  | 0.04442  | ENSMUSG00000045102 |

|                  |       |          |                    |
|------------------|-------|----------|--------------------|
| <i>Pou6f1</i>    | 4.7   | 0.010969 | ENSMUSG00000009739 |
| <i>Ppa1</i>      | 6.64  | 2.964296 | ENSMUSG00000020089 |
| <i>Prmt7</i>     | 9.95  | 0.017826 | ENSMUSG00000060098 |
| <i>Prr5</i>      | 12.28 | 0.026979 | ENSMUSG00000036106 |
| <i>Psd4</i>      | 5.66  | 1.507153 | ENSMUSG00000026979 |
| <i>Psemb9</i>    | 32.46 | 0.015011 | ENSMUSG00000096727 |
| <i>Rad54l2</i>   | 4.9   | 0.02644  | ENSMUSG00000040661 |
| <i>Ralgapb</i>   | 4.03  | 0.042203 | ENSMUSG00000027652 |
| <i>Ralgds</i>    | 4.9   | 0.004091 | ENSMUSG00000026821 |
| <i>Rbm39</i>     | 4.7   | 0.01543  | ENSMUSG00000027620 |
| <i>Rbm48</i>     | 6.95  | 0.381136 | ENSMUSG00000040302 |
| <i>Retsat</i>    | 6.46  | 1.340869 | ENSMUSG00000056666 |
| <i>Ripk1</i>     | 15.11 | 2.172353 | ENSMUSG00000021408 |
| <i>Rn7s1</i>     | 4.59  |          | ENSMUSG00000099021 |
| <i>Rnf157</i>    | 6.95  | 2.678391 | ENSMUSG00000052949 |
| <i>Rnf213</i>    | 12.94 | 0.700089 | ENSMUSG00000070327 |
| <i>Rnu6</i>      | 4.03  |          | ENSMUSG00000095132 |
| <i>Rpe</i>       | 5.66  | 0.001887 | ENSMUSG00000026005 |
| <i>Rpgrip1l</i>  | 5.66  | 1.055708 | ENSMUSG00000033282 |
| <i>Rps15a</i>    | 8.86  | 0.012472 | ENSMUSG00000008683 |
| <i>Rps29</i>     | 4.59  | 0.01543  | ENSMUSG00000034892 |
| <i>Rps7</i>      | 8.83  | 0.034945 | ENSMUSG00000061477 |
| <i>Rtf1</i>      | 6.46  | 0.035529 | ENSMUSG00000027304 |
| <i>Rtn2</i>      | 17.38 | 0.026979 | ENSMUSG00000030401 |
| <i>Rtp4</i>      | 27.77 | 0.980416 | ENSMUSG00000033355 |
| <i>Sema3g</i>    | 6.06  | 0.016881 | ENSMUSG00000021904 |
| <i>Serpinb6a</i> | 15.11 | 0.007209 | ENSMUSG00000060147 |
| <i>Sesn3</i>     | 5.41  | 2.954629 | ENSMUSG00000032009 |
| <i>Sgk2</i>      | 8.86  | 0.001887 | ENSMUSG00000017868 |
| <i>Shisa5</i>    | 12.28 | 0.342305 | ENSMUSG00000025647 |

|                 |       |          |                    |
|-----------------|-------|----------|--------------------|
| <i>Sigirr</i>   | 7.29  | 0.376418 | ENSMUSG00000025494 |
| <i>Slc12a3</i>  | 5.66  | 0.006769 | ENSMUSG00000031766 |
| <i>Slc25a12</i> | 9.95  | 1.0085   | ENSMUSG00000027010 |
| <i>Slc35e2</i>  | 6.14  | 0.007855 | ENSMUSG00000042202 |
| <i>Slc4a10</i>  | 5.41  | 0.006793 | ENSMUSG00000026904 |
| <i>Slc7a6os</i> | 9.95  | 0.005856 | ENSMUSG00000033106 |
| <i>Slco3a1</i>  | 4.7   | 11.80115 | ENSMUSG00000025790 |
| <i>Slfn8</i>    | 10.09 | 0.027093 | ENSMUSG00000035208 |
| <i>Slfn9</i>    | 5.68  | 0.009664 | ENSMUSG00000069793 |
| <i>Snap47</i>   | 6.46  | 0.181311 | ENSMUSG00000009894 |
| <i>Snora62</i>  | 4.7   | 0.039746 | ENSMUSG00000064925 |
| <i>Socs3</i>    | 6.14  | 25.95131 | ENSMUSG00000053113 |
| <i>Spag1</i>    | 4.03  | 0.00254  | ENSMUSG00000037617 |
| <i>Spata22</i>  | 13.67 | 0.001616 | ENSMUSG00000069825 |
| <i>Spef1</i>    | 6.46  | 0.006789 | ENSMUSG00000027329 |
| <i>Spock3</i>   | 4.03  | 0.009183 | ENSMUSG00000054162 |
| <i>Sqstm1</i>   | 4.59  | 0.494311 | ENSMUSG00000015837 |
| <i>Srrm3</i>    | 5.41  | 0.010971 | ENSMUSG00000039860 |
| <i>Stat2</i>    | 21.81 | 0.11997  | ENSMUSG00000040033 |
| <i>Stat3</i>    | 9.03  | 16.79848 | ENSMUSG0000004040  |
| <i>Stat5b</i>   | 6.46  | 0.00901  | ENSMUSG00000020919 |
| <i>Stra6</i>    | 6.95  | 0.180051 | ENSMUSG00000032327 |
| <i>Surf1</i>    | 5.24  | 0.020437 | ENSMUSG00000015790 |
| <i>Surf2</i>    | 5.24  | 0.028101 | ENSMUSG00000014873 |
| <i>Taar6</i>    | 4.03  | 0.036911 | ENSMUSG00000045111 |
| <i>Tab3</i>     | 4.9   | 0.159112 | ENSMUSG00000035476 |
| <i>Tac1</i>     | 10.92 | 0.043067 | ENSMUSG00000061762 |
| <i>Taco1</i>    | 4.59  | 0.000604 | ENSMUSG00000001983 |
| <i>Taco1os</i>  | 4.59  | 0.049683 | ENSMUSG00000085255 |
| <i>Tap1</i>     | 32.46 | 0.106276 | ENSMUSG00000037321 |

|                |       |          |                    |
|----------------|-------|----------|--------------------|
| <i>Tapbp</i>   | 5.13  | 1.513914 | ENSMUSG00000024308 |
| <i>Tcof1</i>   | 6.14  | 0.059027 | ENSMUSG00000024613 |
| <i>Tgtp1</i>   | 13.16 | 2.621252 | ENSMUSG00000078922 |
| <i>Tmed7</i>   | 7.87  | 0.755301 | ENSMUSG00000033184 |
| <i>Tmem214</i> | 8.83  | 0.049683 | ENSMUSG00000038828 |
| <i>Tnfrsf9</i> | 6.95  | 0.723753 | ENSMUSG00000028965 |
| <i>Tnik</i>    | 4.59  | 0.757064 | ENSMUSG00000027692 |
| <i>Tnks</i>    | 8.86  | 0.0169   | ENSMUSG00000031529 |
| <i>Tob1</i>    | 5.41  | 0.031434 | ENSMUSG00000037573 |
| <i>Trim21</i>  | 17.84 | 0.108533 | ENSMUSG00000030966 |
| <i>Trim25</i>  | 8.61  | 5.818    | ENSMUSG00000000275 |
| <i>Trove2</i>  | 15.1  | 0.040343 | ENSMUSG00000018199 |
| <i>Tsta3</i>   | 4.7   | 0.01543  | ENSMUSG00000022570 |
| <i>Ttyh2</i>   | 6.95  | 0.059237 | ENSMUSG00000034714 |
| <i>Ublcp1</i>  | 4.9   | 0.055069 | ENSMUSG00000041231 |
| <i>Ubr4</i>    | 4.7   | 0.003221 | ENSMUSG00000066036 |
| <i>Uchl5</i>   | 15.1  | 0.067287 | ENSMUSG00000018189 |
| <i>Ugt2b35</i> | 4.7   | 0.000138 | ENSMUSG00000035811 |
| <i>Unc80</i>   | 4.9   | 0.012801 | ENSMUSG00000055567 |
| <i>Usp18</i>   | 20.94 | 0.233909 | ENSMUSG00000030107 |
| <i>Utp3</i>    | 6.95  | 0.151617 | ENSMUSG00000070697 |
| <i>Vmn1r85</i> | 6.14  | 0.538599 | ENSMUSG00000070817 |
| <i>Vps18</i>   | 5.66  | 0.034335 | ENSMUSG00000034216 |
| <i>Vps45</i>   | 5.66  | 0.044106 | ENSMUSG00000015747 |
| <i>Vwa3b</i>   | 6.95  | 0.020779 | ENSMUSG00000050122 |
| <i>Wdr73</i>   | 9.95  | 0.03979  | ENSMUSG00000025722 |
| <i>Xpo6</i>    | 12.28 | 3.53079  | ENSMUSG00000000131 |
| <i>Xrcc2</i>   | 6.95  | 0.003967 | ENSMUSG00000028933 |
| <i>Zbp1</i>    | 15.11 | 6.973636 | ENSMUSG00000027514 |
| <i>Zbtb9</i>   | 8.51  | 0.224328 | ENSMUSG00000079605 |

|               |      |          |                    |
|---------------|------|----------|--------------------|
| <i>Zcchc7</i> | 4.9  | 0.006789 | ENSMUSG00000035649 |
| <i>Zfp560</i> | 4.59 | 0.257711 | ENSMUSG00000045519 |
| <i>Zfp58</i>  | 9.95 | 0.093811 | ENSMUSG00000071291 |
| <i>Zfp672</i> | 6.95 | 0.010971 | ENSMUSG00000049755 |
| <i>Zfp770</i> | 4.03 | 0.003727 | ENSMUSG00000040321 |

### Naïve STAT3 Chip-seq vs Affimetrix

| Gene Name            | ChIP-seq p-val | Affymetrix p-val | ENSEMBL            |
|----------------------|----------------|------------------|--------------------|
| <i>1600002H07Rik</i> | 8.07           | 0.002804         | ENSMUSG00000024118 |
| <i>1700084F23Rik</i> | 5.03           | 0.020437         | ENSMUSG00000099639 |
| <i>4732416N19Rik</i> | 19.36          | 0.000138         | ENSMUSG00000107402 |
| <i>4930539J05Rik</i> | 19.36          | 0.004091         | ENSMUSG00000097032 |
| <i>4933430L12Rik</i> | 5.79           |                  | ENSMUSG00000108523 |
| <i>5830468F06Rik</i> | 12.67          |                  | ENSMUSG00000098322 |
| <i>9330175E14Rik</i> | 24.88          | 0.904999         | ENSMUSG00000097194 |
| <i>9930004E17Rik</i> | 14.99          |                  | ENSMUSG00000096052 |
| <i>A230056P14Rik</i> | 11.75          | 0.021815         | ENSMUSG00000087178 |
| <i>AC156953.1</i>    | 5.79           |                  | ENSMUSG00000104690 |
| <i>Acaa1a</i>        | 16.73          | 0.189547         | ENSMUSG00000036138 |
| <i>Akt2</i>          | 9.72           | 7.02101          | ENSMUSG00000004056 |
| <i>Aldh16a1</i>      | 19.36          | 0.358982         |                    |
| <i>Amacr</i>         | 15.44          | 0.324149         | ENSMUSG00000022244 |
| <i>Ankhd1</i>        | 8.07           | 0.020437         | ENSMUSG00000024483 |
| <i>Apobec1</i>       | 11.67          | 0.000604         | ENSMUSG00000040613 |
| <i>Arhgap26</i>      | 5.09           | 0.153812         | ENSMUSG00000036452 |
| <i>Arih1</i>         | 8.07           | 0.011676         | ENSMUSG00000025234 |
| <i>Atp5f1</i>        | 19.36          | 0.15975          | ENSMUSG00000000563 |
| <i>B3gnt1</i>        | 7.5            | 0.024552         | ENSMUSG00000046605 |
| <i>Bard1</i>         | 5.79           | 0.322549         | ENSMUSG00000026196 |

|                      |       |          |                    |
|----------------------|-------|----------|--------------------|
| <i>Batf</i>          | 11.45 | 10.70574 | ENSMUSG00000034266 |
| <i>Baz1a</i>         | 11.75 | 0.108293 | ENSMUSG00000035021 |
| <i>Bcl3</i>          | 8.88  | 24.63781 | ENSMUSG00000053175 |
| <i>Bet1</i>          | 8.79  | 0.052027 | ENSMUSG00000032757 |
| <i>Bin3</i>          | 9.98  | 1.3576   | ENSMUSG00000022089 |
| <i>Birc3</i>         | 9.72  | 1.198029 | ENSMUSG00000032000 |
| <i>C87436</i>        | 11.58 | 0.107295 | ENSMUSG00000046679 |
| <i>Cep128</i>        | 8.88  | 0.402142 | ENSMUSG00000061533 |
| <i>Cep95</i>         | 6.52  | 0.0134   | ENSMUSG00000018372 |
| <i>Chmp4b</i>        | 43    | 2.752581 | ENSMUSG00000038467 |
| <i>Cmah</i>          | 14.18 | 0.004091 | ENSMUSG00000016756 |
| <i>Cmtm6</i>         | 19.36 | 0.999271 | ENSMUSG00000032434 |
| <i>Coq10b</i>        | 8.46  | 0.000786 | ENSMUSG00000025981 |
| <i>Cox7a2</i>        | 6.27  | 0.39032  | ENSMUSG00000032330 |
| <i>Crtc3</i>         | 26.25 | 1.739788 | ENSMUSG00000030527 |
| <i>Cuta</i>          | 6.33  | 0.605567 | ENSMUSG00000024194 |
| <i>Cytip</i>         | 4.41  | 2.323201 | ENSMUSG00000026832 |
| <i>Ddx5</i>          | 6.52  | 0.001839 | ENSMUSG00000020719 |
| <i>Dedd2</i>         | 5.79  | 0.029655 | ENSMUSG00000054499 |
| <i>Dennd4a</i>       | 7.88  | 0.079864 | ENSMUSG00000053641 |
| <i>Desi1</i>         | 9.43  | 0.329335 | ENSMUSG00000022472 |
| <i>Dusp1</i>         | 20.36 | 0.213696 | ENSMUSG00000024190 |
| <i>E330011M16Rik</i> | 8.46  | 0.000786 | ENSMUSG00000103030 |
| <i>Eif5a</i>         | 7.02  | 0.19421  | ENSMUSG00000078812 |
| <i>Emc2</i>          | 5.79  | 0.226682 | ENSMUSG00000022337 |
| <i>Enah</i>          | 5.79  | 0.001508 | ENSMUSG00000022995 |
| <i>Eny2</i>          | 7.88  | 0.184224 | ENSMUSG00000022338 |
| <i>Ergic2</i>        | 19.36 | 0.088338 | ENSMUSG00000030304 |
| <i>Etohd2</i>        | 7.88  | 0.006115 | ENSMUSG00000089875 |
| <i>Etv6</i>          | 14.12 | 23.23103 | ENSMUSG00000030199 |

|                |       |          |                    |
|----------------|-------|----------|--------------------|
| <i>Fas</i>     | 18.03 | 11.76135 | ENSMUSG00000024778 |
| <i>Fastk</i>   | 18.8  | 0.02707  | ENSMUSG00000028959 |
| <i>Fbxl12</i>  | 12.68 | 0.005856 | ENSMUSG00000066892 |
| <i>Fos</i>     | 32.18 | 1.258826 | ENSMUSG00000021250 |
| <i>Gabpb1</i>  | 11.75 | 0.680285 | ENSMUSG00000027361 |
| <i>Galns</i>   | 27.75 | 4.39816  | ENSMUSG00000015027 |
| <i>Gatad2a</i> | 25.18 | 0.052653 | ENSMUSG00000036180 |
| <i>Gbp6</i>    | 14.18 | 0.191536 | ENSMUSG00000104713 |
| <i>Gcc1</i>    | 23.55 | 0.18187  | ENSMUSG00000029708 |
| <i>Gen1</i>    | 20.71 | 0.046166 | ENSMUSG00000051235 |
| <i>Gins1</i>   | 5.03  | 2.339759 | ENSMUSG00000027454 |
| <i>Gm10373</i> | 5.79  | 0.049683 | ENSMUSG00000072592 |
| <i>Gm11345</i> | 14.18 |          | ENSMUSG00000086344 |
| <i>Gm11346</i> | 7.56  | 0.012801 | ENSMUSG00000085603 |
| <i>Gm11439</i> | 5.03  |          | ENSMUSG00000083876 |
| <i>Gm11725</i> | 9.21  | 4.26619  | ENSMUSG00000085434 |
| <i>Gm11849</i> | 5.79  |          | ENSMUSG00000083572 |
| <i>Gm12279</i> | 18.8  | 0.086963 | ENSMUSG00000087120 |
| <i>Gm12356</i> | 31.27 | 0.102705 | ENSMUSG00000085955 |
| <i>Gm16056</i> | 5.09  |          | ENSMUSG00000080941 |
| <i>Gm16174</i> | 17.1  | 7.632426 | ENSMUSG00000087593 |
| <i>Gm16230</i> | 8.07  | 0.118781 | ENSMUSG00000087163 |
| <i>Gm17705</i> | 8.79  | 0.163998 | ENSMUSG00000090936 |
| <i>Gm20036</i> | 14.76 | 0.010137 | ENSMUSG00000093579 |
| <i>Gm22094</i> | 7.88  |          | ENSMUSG00000089601 |
| <i>Gm23885</i> | 7.88  |          | ENSMUSG00000084631 |
| <i>Gm25296</i> | 12.95 |          | ENSMUSG00000064500 |
| <i>Gm26876</i> | 20.3  |          | ENSMUSG00000097372 |
| <i>Gm27003</i> | 11.75 |          | ENSMUSG00000098024 |
| <i>Gm27486</i> | 10.68 |          | ENSMUSG00000099144 |

|                |       |          |                    |
|----------------|-------|----------|--------------------|
| <i>Gm28513</i> | 5.66  |          | ENSMUSG00000099568 |
| <i>Gm28982</i> | 15.44 |          | ENSMUSG00000101832 |
| <i>Gm29243</i> | 10.77 |          | ENSMUSG00000100605 |
| <i>Gm33370</i> | 7.28  |          | ENSMUSG00000105283 |
| <i>Gm37063</i> | 11.75 |          | ENSMUSG00000103805 |
| <i>Gm37415</i> | 10.68 |          | ENSMUSG00000103864 |
| <i>Gm42890</i> | 19.36 |          | ENSMUSG00000105852 |
| <i>Gm43302</i> | 14.18 |          | ENSMUSG00000079362 |
| <i>Gm44077</i> | 35.88 |          | ENSMUSG00000108244 |
| <i>Gm44465</i> | 10.57 |          | ENSMUSG00000105821 |
| <i>Gm4845</i>  | 15.44 | 0.008584 | ENSMUSG00000095238 |
| <i>Gm8013</i>  | 7.28  |          | ENSMUSG00000106357 |
| <i>Gsk3a</i>   | 5.03  | 0.034335 | ENSMUSG00000057177 |
| <i>Gtf2a2</i>  | 42.51 | 0.101279 | ENSMUSG00000033543 |
| <i>H2-T24</i>  | 7     | 0.208997 | ENSMUSG00000053835 |
| <i>Hdac4</i>   | 16.11 | 0.050627 | ENSMUSG00000026313 |
| <i>Helb</i>    | 7.88  | 0.449333 | ENSMUSG00000020228 |
| <i>Hivep2</i>  | 44.33 | 2.754141 | ENSMUSG00000015501 |
| <i>Htt</i>     | 14.12 | 2.243151 | ENSMUSG00000029104 |
| <i>Icam1</i>   | 20.71 | 12.96573 | ENSMUSG00000037405 |
| <i>Ifnar2</i>  | 8.88  | 0.001949 | ENSMUSG00000022971 |
| <i>Ikzf4</i>   | 20.3  | 2.901884 | ENSMUSG00000002578 |
| <i>Il27ra</i>  | 11.45 | 0.011801 | ENSMUSG00000005465 |
| <i>Il6st</i>   | 15.44 | 0.077279 | ENSMUSG00000021756 |
| <i>Ino80c</i>  | 18.8  | 1.481992 | ENSMUSG00000047989 |
| <i>Irak4</i>   | 19.36 | 9.016244 | ENSMUSG00000059883 |
| <i>Isca1</i>   | 7.88  | 0.019318 | ENSMUSG00000044792 |
| <i>Jak3</i>    | 25.5  | 25.86994 | ENSMUSG00000031805 |
| <i>Junb</i>    | 14.56 | 12.20226 | ENSMUSG00000052837 |
| <i>Kif22</i>   | 11.75 | 0.000222 | ENSMUSG00000030677 |



|                 |       |          |                    |
|-----------------|-------|----------|--------------------|
| <i>Kri1</i>     | 13.71 | 6.321984 | ENSMUSG00000035047 |
| <i>Lat</i>      | 15.44 | 0.021815 | ENSMUSG00000030742 |
| <i>Lmna</i>     | 18.03 | 0.007209 | ENSMUSG00000028063 |
| <i>Lsm4</i>     | 19.41 | 0.320315 | ENSMUSG00000031848 |
| <i>Map3k8</i>   | 15.15 | 21.43359 | ENSMUSG00000024235 |
| <i>Mcl1</i>     | 17.26 | 7.457215 | ENSMUSG00000038612 |
| <i>Me3</i>      | 6.16  | 0.161516 | ENSMUSG00000030621 |
| <i>Mettl21a</i> | 15.44 | 0.001887 | ENSMUSG00000025956 |
| <i>Mir7671</i>  | 23.55 |          | ENSMUSG00000099153 |
| <i>Mir7672</i>  | 14.99 |          | ENSMUSG00000098751 |
| <i>Mitd1</i>    | 15.15 | 0.000207 | ENSMUSG00000026088 |
| <i>Mpnd</i>     | 9.72  | 0.01543  | ENSMUSG00000003199 |
| <i>Mrpl17</i>   | 7.88  | 0.01328  | ENSMUSG00000030879 |
| <i>Mrpl30</i>   | 15.15 | 0.020125 | ENSMUSG00000026087 |
| <i>Mrpl51</i>   | 13.71 | 0.020779 | ENSMUSG00000030335 |
| <i>Mul1</i>     | 25.03 | 0.872553 | ENSMUSG00000041241 |
| <i>Mvp</i>      | 18.03 | 1.088916 | ENSMUSG00000030681 |
| <i>Myd88</i>    | 16.73 | 7.422867 | ENSMUSG00000032508 |
| <i>Ncapd2</i>   | 13.71 | 1.050324 | ENSMUSG00000038252 |
| <i>Nepn</i>     | 11.75 | 0.10285  | ENSMUSG00000038624 |
| <i>Nfkb2</i>    | 13.71 | 1.813599 | ENSMUSG00000025225 |
| <i>Nhp2l1</i>   | 8.79  | 0.107149 | ENSMUSG00000063480 |
| <i>Nipa2</i>    | 11.75 | 0.375902 | ENSMUSG00000030452 |
| <i>Nme2</i>     | 12.95 | 0.225628 | ENSMUSG00000020857 |
| <i>Nsmce1</i>   | 35.2  | 0.802504 | ENSMUSG00000030750 |
| <i>Nsun4</i>    | 11.67 | 0.395053 | ENSMUSG00000028706 |
| <i>Nudcd1</i>   | 7.88  | 0.058424 | ENSMUSG00000038736 |
| <i>Nup153</i>   | 13.71 | 2.454328 | ENSMUSG00000021374 |
| <i>Nup88</i>    | 16.92 | 0.025563 | ENSMUSG00000040667 |
| <i>Nup98</i>    | 8.79  | 2.404484 | ENSMUSG00000063550 |

|                 |       |          |                    |
|-----------------|-------|----------|--------------------|
| <i>Oas2</i>     | 8.46  | 2.486726 | ENSMUSG00000032690 |
| <i>Olfr1262</i> | 5.09  | 0.020239 | ENSMUSG00000051313 |
| <i>Olfr508</i>  | 5.79  | 0.010793 | ENSMUSG00000063764 |
| <i>Olfr606</i>  | 5.03  | 0.019563 | ENSMUSG00000073949 |
| <i>Pde12</i>    | 14.99 | 6.432692 | ENSMUSG00000043702 |
| <i>Pgap2</i>    | 8.79  | 0.298369 | ENSMUSG00000030990 |
| <i>Pih1d1</i>   | 19.36 | 2.227244 | ENSMUSG00000003423 |
| <i>Pik3cd</i>   | 16.73 | 1.323772 | ENSMUSG00000039936 |
| <i>Ppa1</i>     | 8.79  | 2.964296 | ENSMUSG00000020089 |
| <i>Prg4</i>     | 5.09  | 1.654114 | ENSMUSG00000006014 |
| <i>Prrc2a</i>   | 8.79  | 0.032057 | ENSMUSG00000024393 |
| <i>Psmc3</i>    | 31.27 | 0.364372 | ENSMUSG00000017221 |
| <i>Pus7l</i>    | 19.36 | 0.006215 | ENSMUSG00000033356 |
| <i>Rab18</i>    | 22.64 | 3.304198 | ENSMUSG00000073639 |
| <i>Rab27a</i>   | 5.79  | 1.305552 | ENSMUSG00000032202 |
| <i>Rab4b</i>    | 20.36 | 0.388055 | ENSMUSG00000053291 |
| <i>Rack1</i>    | 12.95 | 0.002288 | ENSMUSG00000020372 |
| <i>Rapgef6</i>  | 7.02  | 3.284645 | ENSMUSG00000037533 |
| <i>Relb</i>     | 10.57 | 0.189547 | ENSMUSG00000002983 |
| <i>Ribc1</i>    | 36.74 | 0.243827 | ENSMUSG00000025257 |
| <i>Ripk1</i>    | 9.72  | 2.172353 | ENSMUSG00000021408 |
| <i>Rn7s6</i>    | 5.79  |          | ENSMUSG00000092746 |
| <i>Rnasel</i>   | 5.66  | 4.905635 | ENSMUSG00000066800 |
| <i>Rpain</i>    | 16.92 | 5.265866 | ENSMUSG00000018449 |
| <i>Rpl22</i>    | 24.97 | 0.003967 | ENSMUSG00000028936 |
| <i>Rps25</i>    | 8.88  | 0.000604 | ENSMUSG00000009927 |
| <i>Rtn4</i>     | 26.83 | 0.01543  | ENSMUSG00000020458 |
| <i>Sbno1</i>    | 10.68 | 0.04807  | ENSMUSG00000038095 |
| <i>Scp2</i>     | 10.68 | 2.353184 | ENSMUSG00000028603 |
| <i>Sde2</i>     | 7     | 0.763776 | ENSMUSG00000038806 |

|                  |       |          |                    |
|------------------|-------|----------|--------------------|
| <i>Selplg</i>    | 8.79  | 0.172663 | ENSMUSG00000048163 |
| <i>Sema4d</i>    | 7.73  | 9.088714 | ENSMUSG00000021451 |
| <i>Serinc5</i>   | 15.44 | 0.008584 | ENSMUSG00000021703 |
| <i>Serpinb6a</i> | 9.72  | 0.007209 | ENSMUSG00000060147 |
| <i>Sigirr</i>    | 11.45 | 0.376418 | ENSMUSG00000025494 |
| <i>Skap2</i>     | 35.88 | 15.32593 | ENSMUSG00000059182 |
| <i>Slc41a1</i>   | 18.8  | 5.230954 | ENSMUSG00000013275 |
| <i>Smc1a</i>     | 36.74 | 2.957105 | ENSMUSG00000041133 |
| <i>Smc6</i>      | 20.71 | 2.252154 | ENSMUSG00000020608 |
| <i>Socs3</i>     | 22.08 | 25.95131 | ENSMUSG00000053113 |
| <i>Spg11</i>     | 11.75 | 0.007855 | ENSMUSG00000033396 |
| <i>Spsb1</i>     | 11.45 | 0.004091 | ENSMUSG00000039911 |
| <i>Sreb1</i>     | 16.79 | 0.004091 | ENSMUSG00000020538 |
| <i>Ssmem1</i>    | 11.75 | 0.107026 | ENSMUSG00000029784 |
| <i>Stat3</i>     | 78.66 | 16.79848 | ENSMUSG00000004040 |
| <i>Stat5b</i>    | 13.26 | 0.00901  | ENSMUSG00000020919 |
| <i>Suco</i>      | 26.83 | 0.003221 | ENSMUSG00000040297 |
| <i>Susd3</i>     | 8.79  | 4.984352 | ENSMUSG00000021384 |
| <i>Taf5</i>      | 14.76 | 1.604665 | ENSMUSG00000025049 |
| <i>Tbc1d15</i>   | 14.76 | 9.451383 | ENSMUSG00000020130 |
| <i>Tha1</i>      | 9.21  | 10.02412 | ENSMUSG00000017713 |
| <i>Tmem194</i>   | 8.07  | 2.199787 | ENSMUSG00000040195 |
| <i>Tmem209</i>   | 11.75 | 0.115569 | ENSMUSG00000029782 |
| <i>Tnfaip8</i>   | 12.68 | 0.006769 | ENSMUSG00000062210 |
| <i>Tonsl</i>     | 34.05 | 0.097991 | ENSMUSG00000059323 |
| <i>Topors</i>    | 14.18 | 0.00254  | ENSMUSG00000036822 |
| <i>Toporsos</i>  | 14.18 | 0.750736 | ENSMUSG00000028407 |
| <i>Trappc2l</i>  | 27.75 | 1.057909 | ENSMUSG00000015013 |
| <i>Trappc4</i>   | 8.88  | 0.052717 | ENSMUSG00000032112 |
| <i>Trip11</i>    | 14.76 | 0.010137 | ENSMUSG00000021188 |

|                |       |          |                    |
|----------------|-------|----------|--------------------|
| <i>Tspan13</i> | 15.44 | 2.542421 | ENSMUSG00000020577 |
| <i>Tut1</i>    | 20.3  | 0.015445 | ENSMUSG00000071645 |
| <i>Txn2</i>    | 12.95 | 0.030736 | ENSMUSG00000005354 |
| <i>Ubb</i>     | 18.8  | 0.281243 | ENSMUSG00000019505 |
| <i>Ube2d3</i>  | 19.36 | 0.401097 | ENSMUSG00000078578 |
| <i>Ubl5</i>    | 12.68 | 0.070387 | ENSMUSG00000084786 |
| <i>Utp23</i>   | 5.09  | 0.209831 | ENSMUSG00000022313 |
| <i>VeZF1</i>   | 10.57 | 0.000312 | ENSMUSG00000018377 |
| <i>Vmn1r29</i> | 5.79  | 0.004418 | ENSMUSG00000091734 |
| <i>Wdr77</i>   | 19.36 | 0.269183 | ENSMUSG00000000561 |
| <i>Whsc1l1</i> | 9.72  | 0.073015 | ENSMUSG00000054823 |
| <i>Xrcc6</i>   | 9.43  | 0.003412 | ENSMUSG00000022471 |
| <i>Zbp1</i>    | 5.66  | 6.973636 | ENSMUSG00000027514 |
| <i>Zc3hav1</i> | 7     | 0.01543  | ENSMUSG00000029826 |
| <i>Zcchc11</i> | 7     | 0.080774 | ENSMUSG00000034610 |
| <i>Zfp58</i>   | 21.46 | 0.093811 | ENSMUSG00000071291 |
| <i>Zfp94</i>   | 11.75 | 0.039746 | ENSMUSG00000074282 |

### Effector memory (T<sub>EM</sub>) STAT1 Chip-seq vs Affimetrix

| Gene Name            | ChIP-seq p-val | Affymetrix p-val | ENSEMBL             |
|----------------------|----------------|------------------|---------------------|
| <i>1700016D06Rik</i> | 7.57           | 0.136743         | ENSMUSG00000031509  |
| <i>AC156953.1</i>    | 7.57           |                  | ENSMUSG000000104690 |
| <i>Ankrd16</i>       | 4.95           | 0.525976         | ENSMUSG00000047909  |
| <i>Cd209e</i>        | 8.48           | 0.123911         | ENSMUSG00000040197  |
| <i>Cdc27</i>         | 47.71          | 0.782657         | ENSMUSG00000020687  |
| <i>Cdh26</i>         | 12.85          | 0.049483         | ENSMUSG00000039155  |
| <i>Csgalnact2</i>    | 6.53           | 0.351106         | ENSMUSG00000042042  |
| <i>Dock7</i>         | 4.95           | 0.219263         | ENSMUSG00000028556  |
| <i>Foxp2</i>         | 7.57           | 0.068807         | ENSMUSG00000029563  |

|                 |       |          |                    |
|-----------------|-------|----------|--------------------|
| <i>Gm12603</i>  | 9.69  | 0.011047 | ENSMUSG00000085183 |
| <i>Gm14119</i>  | 7.57  |          | ENSMUSG00000082911 |
| <i>Gm18326</i>  | 10.04 |          | ENSMUSG00000108002 |
| <i>Gm23379</i>  | 4.5   |          | ENSMUSG00000096848 |
| <i>Gm24674</i>  | 4.95  |          | ENSMUSG00000095780 |
| <i>Gm25147</i>  | 4.5   |          | ENSMUSG00000064964 |
| <i>Gm25505</i>  | 6.62  |          | ENSMUSG00000087845 |
| <i>Gm25870</i>  | 5.73  |          | ENSMUSG00000094609 |
| <i>Gm28055</i>  | 4.5   |          | ENSMUSG00000101741 |
| <i>Gm43255</i>  | 5.73  |          | ENSMUSG00000104568 |
| <i>Gm43831</i>  | 14.39 |          | ENSMUSG00000105653 |
| <i>Gm43928</i>  | 9.69  |          | ENSMUSG00000108018 |
| <i>Gm43971</i>  | 6.62  |          | ENSMUSG00000107773 |
| <i>Gm44144</i>  | 8.23  |          | ENSMUSG00000107884 |
| <i>Gm44209</i>  | 10.93 |          | ENSMUSG00000107809 |
| <i>Gm5550</i>   | 12.85 |          | ENSMUSG00000106419 |
| <i>Ighv1-8</i>  | 12.85 |          | ENSMUSG00000103667 |
| <i>Kat6a</i>    | 27.99 | 0.167486 | ENSMUSG00000031540 |
| <i>Kmt2a</i>    | 6.62  | 1.86877  | ENSMUSG00000002028 |
| <i>Lce1l</i>    | 5.73  | 0.165796 | ENSMUSG00000046676 |
| <i>Mef2c</i>    | 16.22 | 0.039017 | ENSMUSG00000005583 |
| <i>Mllt4</i>    | 5.73  | 0.030805 | ENSMUSG00000068036 |
| <i>Myl4</i>     | 47.71 | 0.043308 | ENSMUSG00000061086 |
| <i>Nfat5</i>    | 6.64  | 0.084576 | ENSMUSG00000003847 |
| <i>Nrap</i>     | 4.22  | 0.115457 | ENSMUSG00000049134 |
| <i>Nrxn1</i>    | 4.5   | 0.039911 | ENSMUSG00000024109 |
| <i>Olfr1431</i> | 9.69  | 0.209733 | ENSMUSG00000094133 |
| <i>Ppp1r42</i>  | 4.95  | 0.122659 | ENSMUSG00000025916 |
| <i>Prss46</i>   | 4.5   | 0.121836 | ENSMUSG00000049719 |
| <i>Rasal2</i>   | 9.69  | 0.110415 | ENSMUSG00000070565 |

|                   |       |          |                    |
|-------------------|-------|----------|--------------------|
| <i>Rn7s6</i>      | 7.57  |          | ENSMUSG00000092746 |
| <i>Rps15a-ps3</i> | 5.73  |          | ENSMUSG00000084314 |
| <i>Sin3a</i>      | 4.5   | 0.04784  | ENSMUSG00000042557 |
| <i>Sorbs2</i>     | 6.62  | 0.128568 | ENSMUSG00000031626 |
| <i>Stat3</i>      | 7.41  | 5.747516 | ENSMUSG00000004040 |
| <i>Txnrd2</i>     | 5.18  | 0.075543 | ENSMUSG00000075704 |
| <i>Ybx3</i>       | 15.02 | 1.728917 | ENSMUSG00000030189 |

### Effector memory (T<sub>EM</sub>) STAT3 Chip-seq vs Affimetrix

| Gene Name            | ChIP-seq p-val | Affymetrix p-val | ENSEMBL             |
|----------------------|----------------|------------------|---------------------|
| <i>2310001H17Rik</i> | 4.33           | 0.249233         | ENSMUSG00000097354  |
| <i>2310030A07Rik</i> | 6.95           | 0.021133         | ENSMUSG00000099447  |
| <i>2310035C23Rik</i> | 5.08           | 0.205254         | ENSMUSG00000026319  |
| <i>2310057N15Rik</i> | 8              | 0.550917         | ENSMUSG00000048830  |
| <i>2900060B14Rik</i> | 5.08           | 0.024663         | ENSMUSG000000107722 |
| <i>4930535I16Rik</i> | 6.95           | 0.357104         | ENSMUSG00000096969  |
| <i>9930004E17Rik</i> | 4.15           |                  | ENSMUSG00000096052  |
| <i>Anks1b</i>        | 5.08           | 0.083975         | ENSMUSG00000058589  |
| <i>Arih1</i>         | 6.68           | 0.033877         | ENSMUSG00000025234  |
| <i>BC055308</i>      | 11.13          |                  | ENSMUSG000000103973 |
| <i>Ccdc169</i>       | 4.33           | 0.467724         | ENSMUSG00000048655  |
| <i>Ccr6</i>          | 8              | 0.065383         | ENSMUSG00000040899  |
| <i>Cd274</i>         | 6.95           | 0.79357          | ENSMUSG00000016496  |
| <i>Cdc27</i>         | 21.16          | 0.782657         | ENSMUSG00000020687  |
| <i>Ceacam11</i>      | 10.2           | 0.021744         | ENSMUSG00000030368  |
| <i>Chmp4b</i>        | 8.41           | 2.743994         | ENSMUSG00000038467  |
| <i>Clasp1</i>        | 5.08           | 0.248911         | ENSMUSG00000064302  |
| <i>Cltc</i>          | 4.79           | 0.548543         | ENSMUSG00000047126  |
| <i>Cmtm6</i>         | 5.31           | 0.741924         | ENSMUSG00000032434  |

|                      |       |          |                     |
|----------------------|-------|----------|---------------------|
| <i>Cstf2t</i>        | 4.15  | 0.164071 | ENSMUSG00000053536  |
| <i>D830050J10Rik</i> | 5.08  |          | ENSMUSG000000107994 |
| <i>Eef2kmt</i>       | 4.79  | 0.555198 | ENSMUSG00000022544  |
| <i>Eif1a</i>         | 5.87  | 0.744138 | ENSMUSG00000057561  |
| <i>Elmo2</i>         | 10.2  | 1.139456 | ENSMUSG00000017670  |
| <i>Etv6</i>          | 6.95  | 14.02858 | ENSMUSG00000030199  |
| <i>Fgf1</i>          | 6.95  | 0.02661  | ENSMUSG00000036585  |
| <i>Fsbp</i>          | 6.95  | 0.074639 | ENSMUSG00000094595  |
| <i>Galns</i>         | 10.25 | 0.584352 | ENSMUSG00000015027  |
| <i>Gm12145</i>       | 4.15  | 0.079762 | ENSMUSG00000085951  |
| <i>Gm12169</i>       | 4.33  | 0.016156 | ENSMUSG00000078924  |
| <i>Gm12856</i>       | 5.47  | 0.685544 | ENSMUSG00000084133  |
| <i>Gm15809</i>       | 5.08  | 0.559192 | ENSMUSG00000090135  |
| <i>Gm18326</i>       | 26.25 |          | ENSMUSG000000108002 |
| <i>Gm22068</i>       | 5.08  |          | ENSMUSG00000096205  |
| <i>Gm22710</i>       | 5.08  |          | ENSMUSG00000080542  |
| <i>Gm23886</i>       | 5.08  |          | ENSMUSG00000084633  |
| <i>Gm24512</i>       | 6.95  |          | ENSMUSG00000092704  |
| <i>Gm28271</i>       | 5.08  |          | ENSMUSG00000099468  |
| <i>Gm28872</i>       | 5.87  |          | ENSMUSG00000099937  |
| <i>Gm28982</i>       | 5.08  |          | ENSMUSG000000101832 |
| <i>Gm33050</i>       | 10.2  |          | ENSMUSG000000106263 |
| <i>Gm3307</i>        | 9.79  |          | ENSMUSG00000093751  |
| <i>Gm42866</i>       | 5.95  |          | ENSMUSG000000105179 |
| <i>Gm6634</i>        | 6.95  | 0.365465 | ENSMUSG00000097252  |
| <i>Gm8357</i>        | 8.23  |          | ENSMUSG00000097883  |
| <i>Gtf2a2</i>        | 11.21 | 0.382967 | ENSMUSG00000033543  |
| <i>Insc</i>          | 5.87  | 0.042538 | ENSMUSG00000048782  |
| <i>Jak3</i>          | 8.41  | 18.60812 | ENSMUSG00000031805  |
| <i>Kars</i>          | 12.52 | 0.04894  | ENSMUSG00000031948  |

|                 |       |          |                    |
|-----------------|-------|----------|--------------------|
| <i>Kri1</i>     | 6.68  | 1.72795  | ENSMUSG00000035047 |
| <i>March8</i>   | 11.13 | 0.007154 | ENSMUSG00000025702 |
| <i>Mettl21a</i> | 5.08  | 0.032664 | ENSMUSG00000025956 |
| <i>Mir101a</i>  | 4.33  | 0.295675 | ENSMUSG00000065451 |
| <i>Mir6413</i>  | 5.87  |          | ENSMUSG00000098887 |
| <i>Mir6481</i>  | 5.08  |          | ENSMUSG00000098918 |
| <i>Mir7672</i>  | 4.15  |          | ENSMUSG00000098751 |
| <i>Murc</i>     | 4.79  | 0.011132 | ENSMUSG00000028348 |
| <i>Myl4</i>     | 21.16 | 0.043308 | ENSMUSG00000061086 |
| <i>Olf1502</i>  | 8     | 0.123911 | ENSMUSG00000056858 |
| <i>Olf497</i>   | 6.95  | 0.014726 | ENSMUSG00000095239 |
| <i>Pde12</i>    | 4.15  | 4.197534 | ENSMUSG00000043702 |
| <i>Plcb1</i>    | 5.08  | 0.004276 | ENSMUSG00000051177 |
| <i>Plekha4</i>  | 4.15  | 0.006753 | ENSMUSG00000040428 |
| <i>Plgrkt</i>   | 6.95  | 1.163779 | ENSMUSG00000016495 |
| <i>Poldip3</i>  | 4.33  | 0.041833 | ENSMUSG00000041815 |
| <i>Ppp1r15a</i> | 4.15  | 2.310854 | ENSMUSG00000040435 |
| <i>Raf1</i>     | 5.08  | 0.346666 | ENSMUSG00000000441 |
| <i>Rnu11</i>    | 5.87  | 0.011218 | ENSMUSG00000077323 |
| <i>Rragc</i>    | 6.95  | 0.126735 | ENSMUSG00000028646 |
| <i>Scn3b</i>    | 4.33  | 0.059969 | ENSMUSG00000049281 |
| <i>Scp2</i>     | 6.68  | 0.057818 | ENSMUSG00000028603 |
| <i>Sla</i>      | 8     | 1.035363 | ENSMUSG00000022372 |
| <i>Slc17a6</i>  | 4.15  | 0.068697 | ENSMUSG00000030500 |
| <i>Stat3</i>    | 15.97 | 5.747516 | ENSMUSG00000004040 |
| <i>Tcf4</i>     | 9.08  | 0.138273 | ENSMUSG00000053477 |
| <i>Terf2ip</i>  | 12.52 | 0.017476 | ENSMUSG00000033430 |
| <i>Tex14</i>    | 5.08  | 0.417798 | ENSMUSG00000010342 |
| <i>Tmed7</i>    | 5.87  | 0.346305 | ENSMUSG00000033184 |
| <i>Tnc</i>      | 4.33  | 0.320623 | ENSMUSG00000028364 |



|                 |       |          |                    |
|-----------------|-------|----------|--------------------|
| <i>Tonsl</i>    | 12.62 | 0.075095 | ENSMUSG00000059323 |
| <i>Tpm3</i>     | 4.33  | 0.329342 | ENSMUSG00000027940 |
| <i>Trappc2l</i> | 10.25 | 0.01195  | ENSMUSG00000015013 |
| <i>Ube2d2b</i>  | 8     | 0.008745 | ENSMUSG00000063447 |
| <i>Vmp1</i>     | 11.13 | 5.080109 | ENSMUSG00000018171 |

Supplemental Table 2- Primers for ChIP-seq validation: ChIP-qPCR

|                         | Forward              | Probe                  | Reverse                |
|-------------------------|----------------------|------------------------|------------------------|
| <i>Irf1 Promotor</i>    | CCTTCGCCGCTTAGCTCTAC | ACAGCCTGATTCC          | CCCACTCGGCCTCATCATT    |
| <i>Socs3 Promotor</i>   | CTCCGCGCACAGCCTTT    | TGCAGAGTAGTACTAAA      | CCGGCCGGTCTTCTTGT      |
| <i>Non binding site</i> | GCCTTGCGTGACTCTTGAC  | ATCTATTAGAAACGCCACCTAA | ACATGACCAAACACCATTAGCA |

*Stat3*, *IL27ra*, *Cd274*, *Il4ra* and *Junb* primers were designed using “Custom Plus Taqman Assay design tool”

**Supplemental Table 3- Statistical evaluation of transcriptomics datasets:** Common and distinct canonical pathways between naïve and effector memory CD4<sup>+</sup> T cells after IL-6 stimulation

| COMMON CANONICAL PATHWAYS                                                      | Naïve + IL-6                      | Effector memory + IL-6            |
|--------------------------------------------------------------------------------|-----------------------------------|-----------------------------------|
|                                                                                | <b>-log<sub>10</sub>(p-value)</b> | <b>-log<sub>10</sub>(p-value)</b> |
| T Helper Cell Differentiation                                                  | 7.5                               | 8.32                              |
| IL-9 Signaling                                                                 | 6.04                              | 6.6                               |
| Type I Diabetes Mellitus Signaling                                             | 3.96                              | 5.57                              |
| JAK/Stat Signaling                                                             | 4.11                              | 4.64                              |
| STAT3 Pathway                                                                  | 6.23                              | 4.61                              |
| Hepatic Fibrosis / Hepatic Stellate Cell Activation                            | 3.1                               | 3.73                              |
| IL-10 Signaling                                                                | 1.53                              | 3.69                              |
| iNOS Signaling                                                                 | 3.04                              | 3.4                               |
| Autoimmune Thyroid Disease Signaling                                           | 1.91                              | 3.22                              |
| IL-12 Signaling and Production in Macrophages                                  | 1.96                              | 3.14                              |
| Role of JAK1 and JAK3 in $\gamma$ c Cytokine Signaling                         | 5.55                              | 2.8                               |
| Cell Cycle: G1/S Checkpoint Regulation                                         | 2.44                              | 2.78                              |
| Interferon Signaling                                                           | 3.47                              | 2.61                              |
| Role of JAK2 in Hormone-like Cytokine Signaling                                | 2.31                              | 2.58                              |
| Role of Macrophages, Fibroblasts and Endothelial Cells in Rheumatoid Arthritis | 2.02                              | 2.58                              |
| Prolactin Signaling                                                            | 2.23                              | 2.57                              |
| NF- $\kappa$ B Activation by Viruses                                           | 1.45                              | 2.57                              |
| Acute Myeloid Leukemia Signaling                                               | 2.15                              | 2.48                              |
| Glucocorticoid Receptor Signaling                                              | 3.38                              | 2.19                              |
| Cell Cycle: G2/M DNA Damage Checkpoint Regulation                              | 2.86                              | 2.16                              |
| Molecular Mechanisms of Cancer                                                 | 2.47                              | 2.06                              |
| GADD45 Signaling                                                               | 1.83                              | 2.01                              |
| ErbB2-ErbB3 Signaling                                                          | 1.73                              | 1.98                              |

|                                                              |      |      |
|--------------------------------------------------------------|------|------|
| iCOS-iCOSL Signaling in T Helper Cells                       | 1.66 | 1.97 |
| Myc Mediated Apoptosis Signaling                             | 1.71 | 1.96 |
| Colorectal Cancer Metastasis Signaling                       | 1.53 | 1.94 |
| NF- $\kappa$ B Signaling                                     | 2.78 | 1.91 |
| Polyamine Regulation in Colon Cancer                         | 1.71 | 1.89 |
| ERK5 Signaling                                               | 1.62 | 1.86 |
| Activation of IRF by Cytosolic Pattern Recognition Receptors | 1.6  | 1.84 |
| IL-17A Signaling in Airway Cells                             | 1.6  | 1.84 |
| Pyridoxal 5'-phosphate Salvage Pathway                       | 1.6  | 1.84 |
| CD40 Signaling                                               | 2.41 | 1.83 |
| Role of JAK1, JAK2 and TYK2 in Interferon Signaling          | 1.64 | 1.81 |
| Role of JAK family kinases in IL-6-type Cytokine Signaling   | 2.73 | 1.78 |
| Growth Hormone Signaling                                     | 1.51 | 1.76 |
| PDGF Signaling                                               | 2.15 | 1.63 |
| Cyclins and Cell Cycle Regulation                            | 1.38 | 1.62 |
| Crosstalk between Dendritic Cells and Natural Killer Cells   | 1.94 | 1.47 |
| 3-phosphoinositide Biosynthesis                              | 1.72 | 1.45 |
| Death Receptor Signaling                                     | 4.46 | 1.43 |
| Tec Kinase Signaling                                         | 1.69 | 1.43 |
| p53 Signaling                                                | 2.55 | 1.37 |
| B Cell Receptor Signaling                                    | 1.02 | 1.29 |
| NGF Signaling                                                | 1.05 | 1.27 |
| Sertoli Cell-Sertoli Cell Junction Signaling                 | 1    | 1.27 |
| PPAR $\alpha$ /RXR $\alpha$ Activation                       | 1    | 1.27 |
| G-Protein Coupled Receptor Signaling                         | 0.96 | 1.27 |
| Sphingosine-1-phosphate Signaling                            | 0    | 1.25 |
| Clathrin-mediated Endocytosis Signaling                      | 0    | 1.22 |
| Hematopoiesis from Pluripotent Stem Cells                    | 0    | 1.21 |
| CD27 Signaling in Lymphocytes                                | 1.03 | 1.19 |
| Xenobiotic Metabolism Signaling                              | 0.56 | 1.19 |

|                                                                                  |      |      |
|----------------------------------------------------------------------------------|------|------|
| IL-2 Signaling                                                                   | 1.02 | 1.18 |
| Calcium Transport I                                                              | 1.07 | 1.16 |
| HMGB1 Signaling                                                                  | 0    | 1.15 |
| Leukocyte Extravasation Signaling                                                | 0.51 | 1.14 |
| Nur77 Signaling in T Lymphocytes                                                 | 0.37 | 1.12 |
| Regulation of Cellular Mechanics by Calpain Protease                             | 0.37 | 1.12 |
| ATM Signaling                                                                    | 0.94 | 1.1  |
| Calcium-induced T Lymphocyte Apoptosis                                           | 0    | 1.04 |
| Mineralocorticoid Biosynthesis                                                   | 0    | 1.04 |
| Non-Small Cell Lung Cancer Signaling                                             | 0    | 1.03 |
| Role of PI3K/AKT Signaling in the Pathogenesis of Influenza                      | 0.49 | 1.02 |
| Angiopoietin Signaling                                                           | 0    | 1.02 |
| Choline Biosynthesis III                                                         | 0.92 | 1.01 |
| Glucocorticoid Biosynthesis                                                      | 0    | 1.01 |
| Erythropoietin Signaling                                                         | 0.31 | 1    |
| Macropinocytosis Signaling                                                       | 0.31 | 0.99 |
| Remodeling of Epithelial Adherens Junctions                                      | 0    | 0.99 |
| DNA Double-Strand Break Repair by Homologous Recombination                       | 0    | 0.98 |
| DNA Double-Strand Break Repair by Non-Homologous End Joining                     | 0    | 0.98 |
| Gaq Signaling                                                                    | 0    | 0.95 |
| LPS-stimulated MAPK Signaling                                                    | 0.29 | 0.94 |
| Oxidative Ethanol Degradation III                                                | 0    | 0.92 |
| Role of BRCA1 in DNA Damage Response                                             | 0.75 | 0.9  |
| Reelin Signaling in Neurons                                                      | 0.27 | 0.89 |
| Regulation of IL-2 Expression in Activated and Anergic T Lymphocytes             | 0    | 0.89 |
| Role of Wnt/GSK-3 $\beta$ Signaling in the Pathogenesis of Influenza             | 0    | 0.89 |
| Differential Regulation of Cytokine Production in Macrophages and T Helper Cells | 0    | 0.88 |
| Hepatic Cholestasis                                                              | 1.12 | 0.86 |
| DNA damage-induced 14-3-3 $\sigma$ Signaling                                     | 0    | 0.85 |

|                                                                 |      |      |
|-----------------------------------------------------------------|------|------|
| Ethanol Degradation IV                                          | 0    | 0.85 |
| Protein Ubiquitination Pathway                                  | 0    | 0.84 |
| TR/RXR Activation                                               | 0.25 | 0.84 |
| FAK Signaling                                                   | 0.24 | 0.82 |
| OX40 Signaling Pathway                                          | 0.66 | 0.8  |
| Communication between Innate and Adaptive Immune Cells          | 0.65 | 0.79 |
| Factors Promoting Cardiogenesis in Vertebrates                  | 0.22 | 0.78 |
| Granulocyte Adhesion and Diapedesis                             | 1.01 | 0.78 |
| Fcγ Receptor-mediated Phagocytosis in Macrophages and Monocytes | 0.22 | 0.77 |
| PPAR Signaling                                                  | 0.22 | 0.77 |
| Regulation of the Epithelial-Mesenchymal Transition Pathway     | 0.27 | 0.75 |
| Role of Lipids/Lipid Rafts in the Pathogenesis of Influenza     | 0    | 0.74 |
| Antioxidant Action of Vitamin C                                 | 0.21 | 0.74 |
| CDK5 Signaling                                                  | 0.2  | 0.73 |
| Cell Cycle Control of Chromosomal Replication                   | 0.63 | 0.71 |
| HIF1a Signaling                                                 | 0.48 | 0.71 |
| TNFR2 Signaling                                                 | 0    | 0.69 |
| Role of p14/p19ARF in Tumor Suppression                         | 0    | 0.67 |
| Gas Signaling                                                   | 0    | 0.67 |
| Role of Tissue Factor in Cancer                                 | 0    | 0.66 |
| 4-1BB Signaling in T Lymphocytes                                | 0.58 | 0.66 |
| Role of NANOG in Mammalian Embryonic Stem Cell Pluripotency     | 0.53 | 0.66 |
| Ethanol Degradation II                                          | 0    | 0.64 |
| Ga12/13 Signaling                                               | 0.5  | 0.63 |
| TWEAK Signaling                                                 | 0    | 0.63 |
| IL-17A Signaling in Fibroblasts                                 | 0.53 | 0.61 |
| Stearate Biosynthesis I (Animals)                               | 0.53 | 0.61 |
| P2Y Purigenic Receptor Signaling Pathway                        | 0.49 | 0.61 |
| Actin Cytoskeleton Signaling                                    | 0.44 | 0.61 |
| LXR/RXR Activation                                              | 0    | 0.6  |

|                                                                              |      |      |
|------------------------------------------------------------------------------|------|------|
| LPS/IL-1 Mediated Inhibition of RXR Function                                 | 0.77 | 0.6  |
| Complement System                                                            | 0    | 0.59 |
| Cardiac Hypertrophy Signaling                                                | 0.42 | 0.59 |
| April Mediated Signaling                                                     | 0    | 0.58 |
| Docosahexaenoic Acid (DHA) Signaling                                         | 0.49 | 0.57 |
| PI3K Signaling in B Lymphocytes                                              | 0    | 0.57 |
| B Cell Activating Factor Signaling                                           | 0    | 0.56 |
| Neuroprotective Role of THOP1 in Alzheimer's Disease                         | 0    | 0.56 |
| Ovarian Cancer Signaling                                                     | 0    | 0.56 |
| FcγRIIB Signaling in B Lymphocytes                                           | 0    | 0.56 |
| Mechanisms of Viral Exit from Host Cells                                     | 0    | 0.56 |
| Signaling by Rho Family GTPases                                              | 0    | 0.55 |
| Melanoma Signaling                                                           | 0.47 | 0.55 |
| Human Embryonic Stem Cell Pluripotency                                       | 0    | 0.54 |
| Role of Hypercytokinemia/hyperchemokineemia in the Pathogenesis of Influenza | 0    | 0.52 |
| Role of RIG1-like Receptors in Antiviral Innate Immunity                     | 0    | 0.52 |
| Chondroitin Sulfate Biosynthesis (Late Stages)                               | 1.12 | 0.51 |
| Ephrin A Signaling                                                           | 0    | 0.5  |
| TNFR1 Signaling                                                              | 0    | 0.49 |
| Heparan Sulfate Biosynthesis (Late Stages)                                   | 1.06 | 0.48 |
| CNTF Signaling                                                               | 1.03 | 0.47 |
| Aldosterone Signaling in Epithelial Cells                                    | 0.35 | 0.47 |
| UVB-Induced MAPK Signaling                                                   | 0    | 0.46 |
| Gap Junction Signaling                                                       | 0    | 0.46 |
| Role of IL-17A in Arthritis                                                  | 0.38 | 0.46 |
| Role of CHK Proteins in Cell Cycle Checkpoint Control                        | 0.38 | 0.45 |
| EGF Signaling                                                                | 0.98 | 0.44 |
| Protein Kinase A Signaling                                                   | 0.74 | 0.44 |
| Glioma Invasiveness Signaling                                                | 0    | 0.44 |
| Phospholipases                                                               | 0.36 | 0.43 |

|                                                                                 |      |      |
|---------------------------------------------------------------------------------|------|------|
| ErbB4 Signaling                                                                 | 0    | 0.42 |
| Cdc42 Signaling                                                                 | 0.31 | 0.42 |
| Tight Junction Signaling                                                        | 0    | 0.42 |
| Estrogen-Dependent Breast Cancer Signaling                                      | 0    | 0.41 |
| Antiproliferative Role of Somatostatin Receptor 2                               | 0.33 | 0.4  |
| RhoGDI Signaling                                                                | 0    | 0.4  |
| Hypoxia Signaling in the Cardiovascular System                                  | 0    | 0.39 |
| Calcium Signaling                                                               | 0.59 | 0.38 |
| GABA Receptor Signaling                                                         | 0.31 | 0.38 |
| Neurotrophin/TRK Signaling                                                      | 0.31 | 0.38 |
| Role of NFAT in Cardiac Hypertrophy                                             | 0.59 | 0.38 |
| GDNF Family Ligand-Receptor Interactions                                        | 0    | 0.38 |
| Role of MAPK Signaling in the Pathogenesis of Influenza                         | 0.83 | 0.37 |
| CCR5 Signaling in Macrophages                                                   | 0.31 | 0.37 |
| IL-3 Signaling                                                                  | 0.81 | 0.36 |
| GPCR-Mediated Integration of Enteroendocrine Signaling Exemplified by an L Cell | 0.3  | 0.36 |
| IL-17 Signaling                                                                 | 0.29 | 0.36 |
| Basal Cell Carcinoma Signaling                                                  | 0    | 0.36 |
| mTOR Signaling                                                                  | 0    | 0.36 |
| FLT3 Signaling in Hematopoietic Progenitor Cells                                | 0.78 | 0.35 |
| Breast Cancer Regulation by Stathmin1                                           | 0.54 | 0.35 |
| VEGF Family Ligand-Receptor Interactions                                        | 0    | 0.34 |
| Ceramide Signaling                                                              | 0.26 | 0.33 |
| Melanocyte Development and Pigmentation Signaling                               | 0.7  | 0.31 |
| FGF Signaling                                                                   | 0.69 | 0.31 |
| ErbB Signaling                                                                  | 0    | 0.3  |
| HIPPO signaling                                                                 | 0    | 0.3  |
| Bladder Cancer Signaling                                                        | 0.68 | 0.3  |
| CTLA4 Signaling in Cytotoxic T Lymphocytes                                      | 0.67 | 0.3  |
| Neuregulin Signaling                                                            | 0.67 | 0.3  |



|                                                      |      |      |
|------------------------------------------------------|------|------|
| PAK Signaling                                        | 0.23 | 0.29 |
| IL-1 Signaling                                       | 1.22 | 0.29 |
| cAMP-mediated signaling                              | 0.77 | 0.28 |
| SAPK/JNK Signaling                                   | 0.63 | 0.28 |
| Neuropathic Pain Signaling In Dorsal Horn Neurons    | 0    | 0.26 |
| Nitric Oxide Signaling in the Cardiovascular System  | 0    | 0.26 |
| Rac Signaling                                        | 0.56 | 0.25 |
| fMLP Signaling in Neutrophils                        | 0    | 0.24 |
| Renin-Angiotensin Signaling                          | 1.03 | 0.24 |
| Fc Epsilon RI Signaling                              | 0    | 0.24 |
| Natural Killer Cell Signaling                        | 0    | 0.23 |
| phagosome formation                                  | 0.53 | 0.23 |
| 14-3-3-mediated Signaling                            | 0    | 0.22 |
| CCR3 Signaling in Eosinophils                        | 0    | 0.22 |
| p70S6K Signaling                                     | 0    | 0.21 |
| Gai Signaling                                        | 0.48 | 0.21 |
| RhoA Signaling                                       | 0    | 0.21 |
| TGF $\beta$ Signaling                                | 1.26 | 0    |
| Glycoaminoglycan-protein Linkage Region Biosynthesis | 1.17 | 0    |
| Ephrin Receptor Signaling                            | 1.03 | 0    |
| Unfolded protein response                            | 1    | 0    |
| Role of IL-17A in Psoriasis                          | 0.92 | 0    |
| GNRH Signaling                                       | 0.87 | 0    |
| Chondroitin Sulfate Degradation (Metazoa)            | 0.86 | 0    |
| $\gamma$ -glutamyl Cycle                             | 0.86 | 0    |
| Leukotriene Biosynthesis                             | 0.86 | 0    |
| Cardiac $\beta$ -adrenergic Signaling                | 0.84 | 0    |
| Granzyme B Signaling                                 | 0.83 | 0    |
| Relaxin Signaling                                    | 0.83 | 0    |
| Mitochondrial L-carnitine Shuttle Pathway            | 0.81 | 0    |

|                                                            |      |   |
|------------------------------------------------------------|------|---|
| Glutathione Redox Reactions I                              | 0.77 | 0 |
| Granzyme A Signaling                                       | 0.75 | 0 |
| Endoplasmic Reticulum Stress Pathway                       | 0.73 | 0 |
| Triacylglycerol Degradation                                | 0.68 | 0 |
| IL-17A Signaling in Gastric Cells                          | 0.66 | 0 |
| Mitochondrial Dysfunction                                  | 0.62 | 0 |
| RAR Activation                                             | 0.54 | 0 |
| Androgen Signaling                                         | 0.53 | 0 |
| Transcriptional Regulatory Network in Embryonic Stem Cells | 0.49 | 0 |
| Role of IL-17F in Allergic Inflammatory Airway Diseases    | 0.45 | 0 |
| Serotonin Receptor Signaling                               | 0.45 | 0 |
| eNOS Signaling                                             | 0.39 | 0 |
| Semaphorin Signaling in Neurons                            | 0.39 | 0 |
| Axonal Guidance Signaling                                  | 0.37 | 0 |
| Actin Nucleation by ARP-WASP Complex                       | 0.37 | 0 |
| AMPK Signaling                                             | 0.37 | 0 |
| CXCR4 Signaling                                            | 0.35 | 0 |
| PCP pathway                                                | 0.33 | 0 |
| Mitotic Roles of Polo-Like Kinase                          | 0.32 | 0 |
| PXR/RXR Activation                                         | 0.31 | 0 |
| Chemokine Signaling                                        | 0.3  | 0 |
| Ephrin B Signaling                                         | 0.29 | 0 |
| Dopamine Receptor Signaling                                | 0.27 | 0 |
| GPCR-Mediated Nutrient Sensing in Enteroendocrine Cells    | 0.25 | 0 |
| $\alpha$ -Adrenergic Signaling                             | 0.24 | 0 |
| Regulation of Actin-based Motility by Rho                  | 0.23 | 0 |

| DISTINC CANONICAL PATHWAYS                                | Naïve + IL-6                      | Effector memory + IL-6            |
|-----------------------------------------------------------|-----------------------------------|-----------------------------------|
|                                                           | <b>-log<sub>10</sub>(p-value)</b> | <b>-log<sub>10</sub>(p-value)</b> |
| <b>Pathway</b>                                            |                                   |                                   |
| Pancreatic Adenocarcinoma Signaling                       | 3.2                               | 1.28                              |
| p38 MAPK Signaling                                        | 2.97                              | 1.18                              |
| PI3K/AKT Signaling                                        | 2.86                              | 1.13                              |
| Atherosclerosis Signaling                                 | 2.84                              | 0.59                              |
| IL-22 Signaling                                           | 2.79                              | 0.76                              |
| Tumoricidal Function of Hepatic Natural Killer Cells      | 2.79                              | 0.76                              |
| Dermatan Sulfate Biosynthesis                             | 2.62                              | 0.44                              |
| Induction of Apoptosis by HIV1                            | 2.54                              | 1.09                              |
| GM-CSF Signaling                                          | 2.49                              | 1.06                              |
| HGF Signaling                                             | 2.42                              | 0.69                              |
| Cytotoxic T Lymphocyte-mediated Apoptosis of Target Cells | 2.42                              | 0.65                              |
| Oncostatin M Signaling                                    | 2.35                              | 0.63                              |
| Toll-like Receptor Signaling                              | 2.21                              | 0.35                              |
| TREM1 Signaling                                           | 2.19                              | 0.92                              |
| Gustation Pathway                                         | 2.16                              | 0                                 |
| D-myo-inositol (1,4,5,6)-Tetrakisphosphate Biosynthesis   | 2.06                              | 1.09                              |
| D-myo-inositol (3,4,5,6)-tetrakisphosphate Biosynthesis   | 2.06                              | 1.09                              |
| Dermatan Sulfate Biosynthesis (Late Stages)               | 2.03                              | 0.53                              |
| IL-8 Signaling                                            | 2.01                              | 0.75                              |
| Sorbitol Degradation I                                    | 2.01                              | 0                                 |
| UVA-Induced MAPK Signaling                                | 1.95                              | 0.3                               |
| Apoptosis Signaling                                       | 1.94                              | 0.8                               |
| D-myo-inositol-5-phosphate Metabolism                     | 1.85                              | 0.97                              |
| Primary Immunodeficiency Signaling                        | 1.84                              | 1.19                              |
| 3-phosphoinositide Degradation                            | 1.84                              | 0.97                              |
| Chondroitin Sulfate Biosynthesis                          | 1.79                              | 0.46                              |

|                                                                       |      |      |
|-----------------------------------------------------------------------|------|------|
| Telomerase Signaling                                                  | 1.78 | 0.73 |
| Thrombopoietin Signaling                                              | 1.77 | 1.15 |
| Heparan Sulfate Biosynthesis                                          | 1.73 | 0.44 |
| Anandamide Degradation                                                | 1.71 | 0    |
| Estrogen-mediated S-phase Entry                                       | 1.64 | 0.76 |
| Retinoic acid Mediated Apoptosis Signaling                            | 1.6  | 0.4  |
| IL-15 Signaling                                                       | 1.56 | 1.02 |
| IL-15 Production                                                      | 1.54 | 0.71 |
| PTEN Signaling                                                        | 1.53 | 1.17 |
| Glutathione Redox Reactions II                                        | 1.53 | 0    |
| NRF2-mediated Oxidative Stress Response                               | 1.48 | 0.77 |
| Leptin Signaling in Obesity                                           | 1.44 | 0.93 |
| ERK/MAPK Signaling                                                    | 1.42 | 0.36 |
| Agranulocyte Adhesion and Diapedesis                                  | 1.41 | 0.72 |
| Superpathway of Inositol Phosphate Compounds                          | 1.37 | 1.17 |
| Prostate Cancer Signaling                                             | 1.33 | 0.86 |
| Triacylglycerol Biosynthesis                                          | 1.33 | 0.61 |
| tRNA Splicing                                                         | 1.33 | 0    |
| autophagy                                                             | 1.31 | 0    |
| Caveolar-mediated Endocytosis Signaling                               | 0.81 | 4.68 |
| Altered T Cell and B Cell Signaling in Rheumatoid Arthritis           | 1.25 | 4.15 |
| IL-4 Signaling                                                        | 0.76 | 3.46 |
| PKCq Signaling in T Lymphocytes                                       | 0.49 | 3.45 |
| Graft-versus-Host Disease Signaling                                   | 1.09 | 3.25 |
| Dendritic Cell Maturation                                             | 1    | 3.24 |
| Production of Nitric Oxide and Reactive Oxygen Species in Macrophages | 0.99 | 3.23 |
| Allograft Rejection Signaling                                         | 1.28 | 3.22 |
| Virus Entry via Endocytic Pathways                                    | 0.23 | 3.15 |
| Paxillin Signaling                                                    | 0.2  | 2.9  |
| Agrin Interactions at Neuromuscular Junction                          | 0.31 | 2.66 |

|                                                                                  |      |      |
|----------------------------------------------------------------------------------|------|------|
| IL-6 Signaling                                                                   | 0.97 | 2.63 |
| Small Cell Lung Cancer Signaling                                                 | 0.81 | 2.61 |
| B Cell Development                                                               | 0    | 2.61 |
| CD28 Signaling in T Helper Cells                                                 | 0    | 2.6  |
| Antigen Presentation Pathway                                                     | 0    | 2.51 |
| ILK Signaling                                                                    | 0    | 2.43 |
| Aryl Hydrocarbon Receptor Signaling                                              | 0.8  | 2.28 |
| Integrin Signaling                                                               | 0    | 2.27 |
| MSP-RON Signaling Pathway                                                        | 0    | 2.24 |
| nNOS Signaling in Skeletal Muscle Cells                                          | 0.86 | 2.21 |
| Chronic Myeloid Leukemia Signaling                                               | 1.19 | 2.19 |
| Mouse Embryonic Stem Cell Pluripotency                                           | 1.17 | 2.16 |
| IGF-1 Signaling                                                                  | 1.15 | 2.13 |
| Endometrial Cancer Signaling                                                     | 0.4  | 2.09 |
| Role of Osteoblasts, Osteoclasts and Chondrocytes in Rheumatoid Arthritis        | 0    | 2.09 |
| Germ Cell-Sertoli Cell Junction Signaling                                        | 0.33 | 2.05 |
| Lymphotoxin $\beta$ Receptor Signaling                                           | 0    | 2.05 |
| Role of Cytokines in Mediating Communication between Immune Cells                | 0    | 2    |
| Acute Phase Response Signaling                                                   | 1.07 | 1.95 |
| Role of NFAT in Regulation of the Immune Response                                | 0    | 1.93 |
| Endothelin-1 Signaling                                                           | 0.62 | 1.92 |
| Type II Diabetes Mellitus Signaling                                              | 0.5  | 1.85 |
| Differential Regulation of Cytokine Production in Intestinal Epithelial Cells by | 1.85 |      |
| Role of Pattern Recognition Receptors in Recognition of Bacteria and Viruses     | 0.45 | 1.73 |
| PEDF Signaling                                                                   | 0.81 | 1.72 |
| Renal Cell Carcinoma Signaling                                                   | 1.72 |      |
| Hereditary Breast Cancer Signaling                                               | 0.87 | 1.71 |
| Insulin Receptor Signaling                                                       | 0.42 | 1.66 |

|                                                            |      |      |
|------------------------------------------------------------|------|------|
| HER-2 Signaling in Breast Cancer                           | 0.76 | 1.65 |
| VDR/RXR Activation                                         | 0.75 | 1.62 |
| Glioblastoma Multiforme Signaling                          | 0.38 | 1.54 |
| Epithelial Adherens Junction Signaling                     | 0    | 1.54 |
| Systemic Lupus Erythematosus Signaling                     | 0    | 1.51 |
| Heme Degradation                                           | 0    | 1.5  |
| RANK Signaling in Osteoclasts                              | 0.67 | 1.48 |
| Huntington's Disease Signaling                             | 0    | 1.44 |
| VEGF Signaling                                             | 0.22 | 1.43 |
| Salvage Pathways of Pyrimidine Ribonucleotides             | 1.19 | 1.42 |
| Acetate Conversion to Acetyl-CoA                           | 0    | 1.41 |
| Glioma Signaling                                           | 0.62 | 1.4  |
| Thyroid Cancer Signaling                                   | 0.49 | 1.4  |
| Role of PKR in Interferon Induction and Antiviral Response | 0    | 1.4  |
| T Cell Receptor Signaling                                  | 0    | 1.38 |
| Amyotrophic Lateral Sclerosis Signaling                    | 0.6  | 1.37 |
| Wnt/ $\beta$ -catenin Signaling                            | 0.3  | 1.34 |

**Supplemental Table 4- Statistical comparison of ChIP-seq datasets:** associations between Stat1 and/or STAT3 binding to p300 regions and expression data

|                                                | p-value |        | effect size      |                           | power of test |        |
|------------------------------------------------|---------|--------|------------------|---------------------------|---------------|--------|
|                                                | Test 1  | Test 2 | Test 1<br>D-stat | Test 2<br>Cohen's $U_3$   | Test 1        | Test 2 |
| Naïve Set-A vs Naïve Set-B                     | 0.0021  | 0.0013 | 0.1868           | 0.6405<br>CI95: 0.56-0.75 | 88%           | 95%    |
| Effector memory Set-A vs Effector memory Set-B | 0.0128  | 0.0051 | 0.1605           | 0.6177<br>CI95: 0.54-0.71 | 80%           | 84%    |

Statistical associations between Stat1 and/or STAT3 binding to p300 regions in effector memory ( $T_{EM}$ ) was determined. For this, the 8 distinct patterns identified in Fig 7B were separated into two sets: Set-A (groups 4 to 8) contained genes where Stat1 and/or Stat3 positively bind p300 regions. Set-B (groups 1 to 3) comprised genes where Stat1 and/or Stat3 binding is lost (see Supplemental Figure 4). Mapping of the transcriptomic data (log<sub>2</sub>-fold) identified 135 genes in Set-A and 422 genes in Set-B. *Statistical hypotheses testing* revealed that the genes in Set-A and Set-B for naïve ( $T_N$ ) and  $T_{EM}$  populations were not similarly distributed. Statistical significance was determined through two non-parametric tests: Test 1 (*Two-sample Kolmogorov-Smirnov*) and Test 2 (*Wilcoxon rank sum test*). The results of statistical tests were complemented by *effect size measures* and *power of tests* (Table 1). The effect size measure for Test 1 was the test statistic (as defined in Peacock *et al.* 1983 Monthly Notices Royal Astronomy Society 202:615) with  $D_{crit}=0.1344$  and for Test 2 the effect size was Cohen's  $U_3$  using the "Measures of Effect Size Toolbox" (as outlined in Hentschke *et al.* 2011 Eur. J. Neurosc. 34:1887). The power of the test was quantified using bootstrap resampling and p-values are deemed significant if  $p<0.05$ .

The within-group comparison of Set-A between  $T_N$  ( $1.0811 \pm 0.4558$ ) and  $T_{EM}$  ( $1.0313 \pm 0.1891$ ) indicates that the data are similarly distributed (Test 1 and Test 2). This is also true for Set-B genes ( $T_N$   $1.2721 \pm 0.8854$ ;  $T_{EM}$   $1.1385 \pm 0.3747$ ). Interestingly, the Pearson correlation coefficient for the Set-A is weak ( $r=0.33$ ), while a strong positive correlation ( $r=0.8$ ) is seen for Set-B. The coefficient of variation (CV), which measures the spread of variability relative to the mean for Set-A and Set-B shows significant differences. CV for Set-B in  $T_N$  is 2.3719 compared to 5.4537 for  $T_{EM}$ . CV for Set-A in  $T_N$  is 1.4368 compared to 3.0384 for  $T_{EM}$ .

#### References:

- [1] J. A. Peacock, Two-dimensional goodness-of-fit testing in astronomy, Monthly Notices Royal Astronomy Society 202, 615-627, 1983.
- [2] H. Hentschke, M. C. Stüttgen, Computation of measures of effect size for neuroscience data sets, Eur. J. Neurosc. 34, 1887-1894, 2011.

**Supplemental Table 5- Differentially regulated genes by IL-6:** Heat map list of the genes regulated by IL-6. Statistical significance in Z-score (Fold-Change)

| Gene            | Naïve | Naïve + IL-6 | T <sub>EM</sub> | T <sub>EM</sub> + IL-6 |
|-----------------|-------|--------------|-----------------|------------------------|
| <i>Abhd17c</i>  | -0.89 | -0.79        | 0.55            | 1.13                   |
| <i>Ablim1</i>   | -0.03 | 0.72         | 0.72            | -1.40                  |
| <i>Acot7</i>    | -0.95 | -0.72        | 0.52            | 1.15                   |
| <i>Acvr1b</i>   | 0.11  | 0.66         | 0.67            | -1.45                  |
| <i>Adam19</i>   | -0.92 | -0.43        | -0.06           | 1.40                   |
| <i>Ahr</i>      | -0.74 | -0.75        | 0.12            | 1.37                   |
| <i>Als2cl</i>   | 0.77  | 0.43         | 0.27            | -1.47                  |
| <i>Amz2</i>     | -0.67 | -0.97        | 0.44            | 1.20                   |
| <i>Arhgef10</i> | -1.01 | -0.31        | -0.04           | 1.37                   |
| <i>Atp2b4</i>   | -0.93 | -0.60        | 0.20            | 1.32                   |
| <i>Atxn1</i>    | -0.75 | -0.95        | 0.63            | 1.07                   |
| <i>Atxn7l1</i>  | -0.85 | -0.79        | 0.43            | 1.21                   |
| <i>Bach2</i>    | -0.51 | 0.34         | 1.23            | -1.05                  |
| <i>Batf</i>     | -1.20 | 0.17         | -0.20           | 1.22                   |
| <i>Bbs12</i>    | -0.11 | 0.50         | -1.35           | 0.96                   |
| <i>Bcl2l1</i>   | -0.50 | -0.45        | -0.55           | 1.50                   |
| <i>Bcl3</i>     | -0.81 | 0.54         | 1.14            | -0.87                  |
| <i>Bcl6</i>     | -1.39 | 0.34         | 0.08            | 0.97                   |
| <i>Camk2d</i>   | -0.54 | -0.40        | -0.56           | 1.50                   |
| <i>Ccr2</i>     | -0.92 | -0.73        | 0.47            | 1.18                   |
| <i>Cd200</i>    | -1.40 | 0.36         | 0.09            | 0.95                   |
| <i>Cd274</i>    | -0.53 | -0.55        | -0.42           | 1.50                   |
| <i>Cd52</i>     | 0.69  | 0.92         | -0.37           | -1.24                  |
| <i>Cd69</i>     | -0.50 | -0.65        | -0.33           | 1.49                   |
| <i>Cdk6</i>     | -0.82 | -0.73        | 0.22            | 1.32                   |
| <i>Ceacam16</i> | -0.68 | -0.80        | 0.10            | 1.37                   |
| <i>Ceacam19</i> | -0.81 | 0.87         | -0.92           | 0.86                   |
| <i>Cetn4</i>    | -1.37 | 0.96         | -0.05           | 0.45                   |
| <i>Cish</i>     | -0.91 | -0.63        | 0.24            | 1.31                   |
| <i>Clec16a</i>  | -0.53 | 0.05         | 1.38            | -0.90                  |
| <i>Cmtm6</i>    | 0.14  | 0.87         | 0.42            | -1.43                  |
| <i>Cmtm7</i>    | 1.45  | -0.11        | -0.59           | -0.74                  |
| <i>Cmtm8</i>    | -0.72 | 1.27         | -0.87           | 0.33                   |
| <i>Csrnp1</i>   | -1.02 | -0.43        | 0.13            | 1.32                   |
| <i>Ctla4</i>    | -0.85 | -0.80        | 0.45            | 1.20                   |
| <i>Cxcr5</i>    | -0.79 | -0.62        | 0.01            | 1.41                   |
| <i>Cytip</i>    | -0.02 | 0.63         | 0.80            | -1.40                  |
| <i>Dad1</i>     | -0.52 | -0.08        | -0.83           | 1.43                   |
| <i>Dpm3</i>     | 1.21  | 0.21         | -1.20           | -0.22                  |



|                  |       |       |       |       |
|------------------|-------|-------|-------|-------|
| <i>Dst</i>       | -0.96 | -0.65 | 0.39  | 1.22  |
| <i>Dusp10</i>    | 1.00  | 0.16  | 0.23  | -1.39 |
| <i>Dusp5</i>     | -0.95 | -0.74 | 0.60  | 1.09  |
| <i>Efna1</i>     | -0.03 | -0.43 | -0.93 | 1.39  |
| <i>Efna3</i>     | -0.68 | -0.79 | 0.10  | 1.38  |
| <i>Egln3</i>     | -0.79 | -0.76 | 0.22  | 1.32  |
| <i>Egr2</i>      | -0.65 | -0.86 | 0.18  | 1.34  |
| <i>Ell</i>       | -0.86 | -0.54 | 1.41  | -0.01 |
| <i>Esm1</i>      | -0.68 | -0.65 | -0.12 | 1.45  |
| <i>Etv6</i>      | -1.16 | -0.04 | -0.08 | 1.28  |
| <i>Fam107b</i>   | -0.16 | -1.17 | 0.07  | 1.26  |
| <i>Fam189b</i>   | 0.14  | 0.61  | 0.70  | -1.45 |
| <i>Fam20a</i>    | -0.77 | -0.07 | -0.59 | 1.43  |
| <i>Fasl</i>      | -0.77 | -0.93 | 0.62  | 1.08  |
| <i>Fgf2</i>      | -0.07 | 1.44  | -0.72 | -0.64 |
| <i>Fgf2os</i>    | -0.56 | -0.19 | 1.46  | -0.71 |
| <i>Fkbp8</i>     | -0.41 | 0.63  | 0.99  | -1.21 |
| <i>Fnbp1</i>     | -0.25 | -0.65 | -0.58 | 1.48  |
| <i>Fosl2</i>     | -0.90 | -0.82 | 0.69  | 1.02  |
| <i>Frmd4b</i>    | -0.44 | -0.74 | -0.29 | 1.47  |
| <i>Gabarapl1</i> | -0.74 | -0.90 | 0.43  | 1.21  |
| <i>Gba</i>       | -1.34 | -0.04 | 0.33  | 1.04  |
| <i>Gdf15</i>     | -0.75 | 1.37  | -0.75 | 0.13  |
| <i>Gimap1</i>    | 0.21  | 0.30  | 0.92  | -1.42 |
| <i>Gimap4</i>    | 0.43  | 0.48  | 0.59  | -1.50 |
| <i>Gimap5</i>    | -1.24 | -0.33 | 0.54  | 1.03  |
| <i>Gimap6</i>    | 0.25  | 0.43  | 0.79  | -1.46 |
| <i>Gimap7</i>    | 0.06  | 0.25  | 1.05  | -1.36 |
| <i>Gimap8</i>    | 0.34  | 0.49  | 0.66  | -1.49 |
| <i>Gimap9</i>    | 0.23  | 0.52  | 0.71  | -1.47 |
| <i>Gna13</i>     | -0.83 | -0.75 | 0.29  | 1.29  |
| <i>Gpm6b</i>     | -0.83 | -0.86 | 0.56  | 1.12  |
| <i>Gpr107</i>    | -0.32 | 0.79  | -1.28 | 0.80  |
| <i>Gpr65</i>     | -0.76 | -0.89 | 0.45  | 1.20  |
| <i>Grasp</i>     | -0.50 | -0.53 | -0.47 | 1.50  |
| <i>Grb2</i>      | -0.87 | -0.74 | 0.36  | 1.25  |
| <i>Grb7</i>      | 1.50  | -0.48 | -0.50 | -0.52 |
| <i>Gzmk</i>      | -0.84 | -0.84 | 0.54  | 1.14  |
| <i>Hdac7</i>     | -0.62 | -0.21 | -0.64 | 1.47  |
| <i>Hemk1</i>     | 1.27  | 0.33  | -0.72 | -0.87 |
| <i>Hif1a</i>     | -0.94 | -0.61 | 0.26  | 1.29  |
| <i>Hipk2</i>     | -1.14 | -0.17 | 0.02  | 1.29  |
| <i>Hook2</i>     | -1.14 | 0.23  | 1.24  | -0.33 |

|                 |       |       |       |       |
|-----------------|-------|-------|-------|-------|
| <i>Ifng</i>     | -0.83 | -0.81 | 0.42  | 1.22  |
| <i>Ikzf1</i>    | -0.84 | -0.14 | -0.45 | 1.44  |
| <i>Ikzf3</i>    | 0.99  | -1.20 | -0.42 | 0.64  |
| <i>Il10</i>     | -0.74 | -0.77 | 0.14  | 1.36  |
| <i>Il17a</i>    | 0.67  | 0.87  | -0.23 | -1.32 |
| <i>Il17ra</i>   | -0.34 | 0.70  | 0.90  | -1.26 |
| <i>Il1r1</i>    | -0.75 | -0.47 | -0.25 | 1.47  |
| <i>Il21</i>     | -0.77 | -0.09 | -0.58 | 1.44  |
| <i>Il21r</i>    | -1.26 | -0.27 | 0.49  | 1.04  |
| <i>Il2ra</i>    | -0.97 | -0.72 | 0.58  | 1.11  |
| <i>Il2rb</i>    | -0.87 | -0.85 | 0.68  | 1.03  |
| <i>Il4</i>      | -0.88 | -0.83 | 0.69  | 1.02  |
| <i>Il4ra</i>    | -1.39 | 0.74  | -0.07 | 0.72  |
| <i>Irf4</i>     | -1.01 | -0.50 | 0.21  | 1.30  |
| <i>Irf8</i>     | -0.93 | -0.63 | 0.26  | 1.30  |
| <i>Isyna1</i>   | -0.47 | -0.54 | -0.49 | 1.50  |
| <i>Itpk1</i>    | -0.94 | -0.55 | 0.15  | 1.34  |
| <i>Jak2</i>     | -0.92 | -0.77 | 0.60  | 1.10  |
| <i>Junb</i>     | -1.28 | -0.04 | 0.18  | 1.15  |
| <i>Kdm5a</i>    | 0.26  | 0.53  | 0.69  | -1.48 |
| <i>Kdm6b</i>    | -0.84 | -0.85 | 0.57  | 1.12  |
| <i>Khdrbs1</i>  | -0.80 | -0.64 | 0.05  | 1.39  |
| <i>Krtcap2</i>  | -0.36 | 0.80  | -1.25 | 0.81  |
| <i>Ksr1</i>     | -0.84 | -0.72 | 0.25  | 1.31  |
| <i>Kxd1</i>     | 0.28  | 0.43  | 0.76  | -1.47 |
| <i>Lamc1</i>    | -0.78 | -0.83 | 0.35  | 1.26  |
| <i>Leo1</i>     | -0.89 | 0.14  | -0.60 | 1.35  |
| <i>Lif</i>      | -0.29 | -1.01 | -0.07 | 1.37  |
| <i>Lmna</i>     | -1.20 | 0.50  | 1.08  | -0.38 |
| <i>Lmnb1</i>    | -0.96 | -0.57 | 0.22  | 1.31  |
| <i>Lpp</i>      | -1.29 | 0.52  | -0.24 | 1.01  |
| <i>Lrig1</i>    | -0.76 | -0.84 | 0.33  | 1.27  |
| <i>Lrrc25</i>   | 0.36  | 0.80  | -1.46 | 0.30  |
| <i>Lrrc75a</i>  | 0.15  | -0.80 | 1.35  | -0.71 |
| <i>Ly6a</i>     | -1.36 | 0.79  | -0.14 | 0.71  |
| <i>Malt1</i>    | -1.04 | -0.09 | -0.24 | 1.36  |
| <i>Mapk6</i>    | -0.89 | -0.70 | 0.32  | 1.27  |
| <i>Mapkapk2</i> | -1.00 | -0.42 | 0.08  | 1.34  |
| <i>Mapkapk3</i> | -0.68 | -0.98 | 0.52  | 1.14  |
| <i>Mdfic</i>    | -0.84 | -0.82 | 0.49  | 1.18  |
| <i>Med29</i>    | -0.50 | -0.40 | -0.60 | 1.50  |
| <i>Mfsd2a</i>   | -0.69 | -0.20 | -0.58 | 1.47  |
| <i>Mien1</i>    | 0.47  | 0.40  | -1.49 | 0.62  |

|                 |       |       |       |       |
|-----------------|-------|-------|-------|-------|
| <i>Mif4gd</i>   | -0.83 | -0.65 | 0.11  | 1.37  |
| <i>Mir92b</i>   | -0.89 | -0.56 | 1.37  | 0.08  |
| <i>Mpzl2</i>    | -0.83 | -0.50 | -0.10 | 1.43  |
| <i>Mt2</i>      | -0.57 | -0.87 | 0.06  | 1.38  |
| <i>Mtx1</i>     | -0.75 | -0.31 | -0.42 | 1.47  |
| <i>Muc1</i>     | -0.81 | 0.39  | 1.23  | -0.82 |
| <i>Myo3b</i>    | -0.81 | -0.75 | 0.25  | 1.31  |
| <i>Neu3</i>     | 0.03  | -0.41 | 1.36  | -0.99 |
| <i>Nfil3</i>    | -0.81 | -0.76 | 0.27  | 1.30  |
| <i>Nmrk1</i>    | -0.79 | -0.87 | 0.48  | 1.18  |
| <i>Notch1</i>   | -1.44 | 0.40  | 0.17  | 0.87  |
| <i>Nr4a1</i>    | -0.76 | -0.91 | 0.54  | 1.14  |
| <i>Paf1</i>     | -1.16 | 0.55  | 1.07  | -0.46 |
| <i>Pdcd1lg2</i> | -0.52 | -0.37 | -0.60 | 1.49  |
| <i>Pgs1</i>     | -1.24 | 0.04  | -0.02 | 1.21  |
| <i>Pim1</i>     | -1.29 | -0.21 | 0.44  | 1.06  |
| <i>Platr22</i>  | -0.84 | -0.17 | 1.44  | -0.43 |
| <i>Plekhg2</i>  | -0.11 | 0.04  | 1.26  | -1.19 |
| <i>Plgrkt</i>   | -0.33 | -0.94 | -0.14 | 1.41  |
| <i>Pmepa1</i>   | -1.37 | 0.32  | 0.03  | 1.01  |
| <i>Pnpo</i>     | -1.36 | 0.66  | -0.14 | 0.84  |
| <i>Prdx2</i>    | 0.08  | 1.32  | -1.07 | -0.33 |
| <i>Prkar1a</i>  | -0.92 | -0.52 | 0.06  | 1.37  |
| <i>Prss16</i>   | -0.52 | -0.71 | 1.47  | -0.24 |
| <i>Prss41</i>   | 0.42  | -0.45 | -1.13 | 1.16  |
| <i>Prss45</i>   | -1.49 | 0.68  | 0.46  | 0.35  |
| <i>Prss50</i>   | 1.02  | -1.30 | -0.19 | 0.47  |
| <i>Ptpn1</i>    | -0.67 | -0.18 | -0.62 | 1.46  |
| <i>Rbpj</i>     | -0.69 | -0.69 | -0.04 | 1.43  |
| <i>Rgs1</i>     | -0.85 | -0.86 | 0.64  | 1.06  |
| <i>Rnaseh2a</i> | 0.09  | 0.27  | 1.01  | -1.38 |
| <i>Rnf149</i>   | -0.97 | 0.06  | -0.46 | 1.36  |
| <i>Rnf157</i>   | -0.91 | -0.81 | 0.71  | 1.01  |
| <i>Rnf43</i>    | -0.82 | -0.87 | 0.59  | 1.10  |
| <i>S100a6</i>   | -0.86 | -0.81 | 0.51  | 1.16  |
| <i>Scamp3</i>   | -1.39 | 0.22  | 0.18  | 0.99  |
| <i>Sema4a</i>   | -0.68 | 0.32  | 1.27  | -0.90 |
| <i>Sh3bgrl3</i> | 0.89  | 0.67  | -0.25 | -1.30 |
| <i>Sla</i>      | -0.74 | -0.97 | 0.67  | 1.03  |
| <i>Slamf1</i>   | -0.98 | -0.65 | 0.44  | 1.19  |
| <i>Slc24a3</i>  | -0.69 | -0.71 | -0.02 | 1.42  |
| <i>Slc25a19</i> | -0.65 | -0.62 | -0.19 | 1.47  |
| <i>Slc50a1</i>  | 0.66  | 0.59  | 0.23  | -1.47 |

|                 |       |       |       |       |
|-----------------|-------|-------|-------|-------|
| <i>Smad3</i>    | 0.34  | -0.86 | -0.74 | 1.26  |
| <i>Smndc1</i>   | -0.95 | -0.66 | 0.39  | 1.23  |
| <i>Snord49a</i> | -0.18 | -0.75 | -0.53 | 1.46  |
| <i>Snord49b</i> | 1.46  | -0.21 | -0.51 | -0.75 |
| <i>Snord65</i>  | -0.25 | -0.41 | -0.80 | 1.46  |
| <i>Socs1</i>    | -1.05 | -0.11 | -0.20 | 1.36  |
| <i>Socs3</i>    | -0.83 | 0.83  | 0.90  | -0.90 |
| <i>Sox5</i>     | 0.52  | -1.15 | 1.09  | -0.46 |
| <i>Spcs2</i>    | -1.28 | 0.36  | -0.18 | 1.10  |
| <i>Spty2d1</i>  | -0.89 | -0.74 | 0.39  | 1.23  |
| <i>Ssbp4</i>    | -1.39 | 0.04  | 0.41  | 0.95  |
| <i>Stat3</i>    | -1.32 | 0.02  | 0.20  | 1.10  |
| <i>Stk10</i>    | 1.09  | 0.13  | 0.12  | -1.34 |
| <i>Stk17b</i>   | -0.75 | -0.39 | -0.33 | 1.47  |
| <i>Stx11</i>    | -0.93 | -0.76 | 0.60  | 1.09  |
| <i>Tg</i>       | -0.89 | 0.88  | -0.84 | 0.85  |
| <i>Tgfb3</i>    | -0.77 | -0.79 | 0.25  | 1.31  |
| <i>Thbs3</i>    | -0.63 | 1.24  | -0.97 | 0.36  |
| <i>Tmem65</i>   | -0.65 | -0.81 | 0.07  | 1.39  |
| <i>Tmie</i>     | 0.78  | -0.12 | 0.72  | -1.37 |
| <i>Tnf</i>      | -0.67 | -0.99 | 0.51  | 1.15  |
| <i>Tnfaip8</i>  | -0.81 | -0.84 | 0.45  | 1.20  |
| <i>Tnfrsf9</i>  | -0.83 | -0.85 | 0.56  | 1.13  |
| <i>Tnfsf8</i>   | -1.19 | -0.39 | 0.49  | 1.09  |
| <i>Tnip3</i>    | -0.75 | -0.69 | 0.04  | 1.40  |
| <i>Top2a</i>    | -0.93 | -0.62 | 0.27  | 1.29  |
| <i>Trem12</i>   | -0.53 | 0.95  | 0.72  | -1.14 |
| <i>Trem14</i>   | 1.00  | 0.36  | -1.37 | 0.01  |
| <i>Trerf1</i>   | -0.61 | -0.99 | 0.36  | 1.24  |
| <i>Trim46</i>   | -0.39 | 0.18  | 1.29  | -1.07 |
| <i>Trpv2</i>    | 1.31  | 0.10  | -0.31 | -1.09 |
| <i>Tspan14</i>  | 0.80  | 0.45  | 0.20  | -1.45 |
| <i>Tspan2</i>   | 0.84  | -0.70 | -1.02 | 0.88  |
| <i>Tspan2os</i> | -0.85 | 0.15  | 1.35  | -0.65 |
| <i>Tspan5</i>   | -0.83 | -0.05 | -0.55 | 1.42  |
| <i>Ttc39b</i>   | -1.23 | -0.08 | 0.11  | 1.21  |
| <i>Twf1</i>     | -1.41 | 0.07  | 0.42  | 0.91  |
| <i>Uba52</i>    | 0.69  | 0.70  | 0.04  | -1.43 |
| <i>Ubal2</i>    | -1.01 | -0.54 | 0.27  | 1.27  |
| <i>Ubb</i>      | -0.45 | 0.76  | 0.88  | -1.20 |
| <i>Ubc</i>      | -0.37 | -0.64 | -0.48 | 1.49  |
| <i>Ubxn11</i>   | -0.51 | 0.20  | -1.00 | 1.31  |
| <i>Uvrag</i>    | -0.25 | 1.33  | 0.01  | -1.09 |

|              |       |       |       |       |
|--------------|-------|-------|-------|-------|
| <i>Vmp1</i>  | -1.28 | 0.08  | 0.05  | 1.16  |
| <i>Vps54</i> | -0.81 | -0.64 | 0.06  | 1.39  |
| <i>Xrra1</i> | -0.44 | 0.89  | -1.20 | 0.75  |
| <i>Zfp36</i> | -1.14 | 0.96  | 0.71  | -0.53 |

**Supplemental Table 6- Molecular pathways comparison of the distinct pattern datasets:** Heat map list of the canonical pathways from Ingenuity Pathways analysis. Statistical significance in  $-\text{Log}(p\text{-value})$  as obtained through a Comparative Core-Analysis

| Canonical Pathway                                                              | Pattern | Pattern | Pattern | Pattern | Pattern |
|--------------------------------------------------------------------------------|---------|---------|---------|---------|---------|
|                                                                                | 1       | 2       | 3       | 4       | 5       |
| Neuroprotective Role of THOP1 in Alzheimer's Disease                           | 6.73    | 0       | 0       | 0       | 0       |
| Huntington's Disease Signaling                                                 | 0       | 0       | 1.47    | 0       | 0       |
| Apoptosis Signaling                                                            | 0       | 0       | 2.26    | 0       | 0       |
| Myo-inositol Biosynthesis                                                      | 0       | 0       | 0       | 2.46    | 0       |
| Actin Nucleation by ARP-WASP Complex                                           | 0       | 0       | 0       | 1.37    | 0       |
| Semaphorin Signaling in Neurons                                                | 0       | 0       | 0       | 1.44    | 0       |
| Autoimmune Thyroid Disease Signaling                                           | 0       | 0       | 0       | 1.48    | 0       |
| Role of Macrophages, Fibroblasts and Endothelial Cells in Rheumatoid Arthritis | 0       | 1.45    | 0       | 0       | 1.04    |
| Osteoarthritis Pathway                                                         | 0       | 0.74    | 0       | 0       | 1.36    |
| Regulation of the Epithelial-Mesenchymal Transition Pathway                    | 0       | 0.78    | 0       | 0       | 1.42    |
| PPAR $\alpha$ /RXR $\alpha$ Activation                                         | 0       | 0.79    | 0       | 0       | 1.46    |
| TGF- $\beta$ Signaling                                                         | 0       | 0       | 0       | 0       | 2.02    |
| Ephrin A Signaling                                                             | 0       | 0       | 0       | 0       | 2.39    |
| Hepatic Fibrosis / Hepatic Stellate Cell Activation                            | 0       | 0       | 0       | 0       | 1.45    |
| Ephrin Receptor Signaling                                                      | 0       | 0       | 0       | 0       | 1.49    |
| IL-17A Signaling in Gastric Cells                                              | 0       | 0       | 0       | 0       | 1.41    |
| Antiproliferative Role of TOB in T Cell Signaling                              | 0       | 0       | 0       | 0       | 1.39    |
| Role of IL-17A in Psoriasis                                                    | 0       | 0       | 0       | 0       | 1.69    |
| Human Embryonic Stem Cell Pluripotency                                         | 0       | 0       | 0       | 0       | 1.67    |
| Dolichyl-diphosphooligosaccharide Biosynthesis                                 | 0       | 0       | 0       | 0       | 1.76    |
| Adipogenesis pathway                                                           | 0       | 0       | 0       | 0       | 1.72    |

|                                                            |   |      |      |      |      |
|------------------------------------------------------------|---|------|------|------|------|
| Th1 and Th2 Activation Pathway                             | 0 | 4.64 | 0    | 0.91 | 1.46 |
| Th1 Pathway                                                | 0 | 3.60 | 0    | 1.04 | 0.71 |
| Th2 Pathway                                                | 0 | 3.46 | 0    | 0    | 1.6  |
| STAT3 Pathway                                              | 0 | 3.94 | 0    | 0    | 1.9  |
| IL-9 Signaling                                             | 0 | 5.03 | 0    | 0    | 0    |
| JAK/Stat Signaling                                         | 0 | 4.13 | 1.00 | 0    | 0    |
| Role of JAK2 in Hormone-like Cytokine Signaling            | 0 | 3.34 | 0    | 0    | 0    |
| Role of JAK family kinases in IL-6-type Cytokine Signaling | 0 | 3.61 | 0    | 0    | 0    |
| Role of JAK1 and JAK3 in $\gamma$ c Cytokine Signaling     | 0 | 2.64 | 0    | 0    | 0.94 |
| Notch Signaling                                            | 0 | 1.46 | 0    | 0    | 0    |
| Interferon Signaling                                       | 0 | 1.48 | 0    | 0    | 0    |
| Phosphatidylglycerol Biosynthesis II (Non-plastidic)       | 0 | 1.62 | 0    | 0    | 0    |
| Role of JAK1, JAK2 and TYK2 in Interferon Signaling        | 0 | 1.65 | 0    | 0    | 0    |
| IL-22 Signaling                                            | 0 | 1.65 | 0    | 0    | 0    |
| Cardiolipin Biosynthesis II                                | 0 | 2.73 | 0    | 0    | 0    |
| Growth Hormone Signaling                                   | 0 | 2.55 | 0    | 0    | 0    |
| Prolactin Signaling                                        | 0 | 2.51 | 0    | 0    | 0    |
| Erythropoietin Signaling                                   | 0 | 2.53 | 0    | 0    | 0    |
| Type II Diabetes Mellitus Signaling                        | 0 | 2.05 | 0    | 0    | 0    |
| Acute Phase Response Signaling                             | 0 | 1.94 | 0    | 0    | 0    |
| IL-6 Signaling                                             | 0 | 2.17 | 0    | 0    | 0    |
| Type I Diabetes Mellitus Signaling                         | 0 | 2.33 | 0    | 0    | 0    |
| IGF-1 Signaling                                            | 0 | 2.32 | 0    | 0    | 0    |
